# A structural mechanism for phosphorylation-dependent inactivation of the AP2 complex

Edward A. Partlow<sup>1,\*</sup>, Richard W. Baker<sup>2,\*,#</sup>, Gwendolyn M. Beacham<sup>1</sup>, Joshua S. Chappie<sup>1</sup>,  
Andres E. Leschziner<sup>2,3,#</sup>, Gunther Hollopeter<sup>1,#</sup>

## Affiliations

1. Department of Molecular Medicine, Cornell University, Ithaca, New York, USA.

2. Department of Cellular & Molecular Medicine, School of Medicine, University of California San Diego, La Jolla, California 92093, USA.

3. Section of Molecular Biology, Division of Biological Sciences, University of California San Diego, La Jolla, California 92093, USA.

\* These authors contributed equally to this work.

# Correspondence to: [ribaker@ucsd.edu](mailto:ribaker@ucsd.edu) (R.W.B.); [aleschziner@ucsd.edu](mailto:aleschziner@ucsd.edu) (A.E.L.); [gh383@cornell.edu](mailto:gh383@cornell.edu) (G.H.).

## Abstract

Endocytosis of transmembrane proteins is orchestrated by the AP2 clathrin adaptor complex. AP2 dwells in a closed, inactive state in the cytosol, but adopts an open, active conformation on the plasma membrane. Membrane-activated complexes are also phosphorylated, but the significance of this mark is debated. We recently proposed that NECAP negatively regulates AP2 by binding open and phosphorylated complexes (Beacham *et al.*, 2018). Here, we report high-resolution cryo-EM structures of NECAP bound to phosphorylated AP2. The site of AP2 phosphorylation is directly coordinated by residues of the NECAP PHear domain that are predicted from genetic screens in *C. elegans*. Using membrane mimetics to generate conformationally open AP2, we find that a second domain of NECAP binds these complexes and cryo-EM reveals both domains of NECAP engaging closed, inactive AP2. Assays *in vitro* and *in vivo* confirm these domains cooperate to inactivate AP2. We propose that phosphorylation marks adaptors for inactivation.

## 28 **Introduction**

29 Clathrin-Mediated Endocytosis (CME) enables cells to dynamically regulate the  
30 composition of the plasma membrane and mediate uptake of transmembrane cargo, such as  
31 ligand-bound receptors. This process is orchestrated by the clathrin Adaptor Protein 2 complex  
32 (AP2), which interacts with much of the endocytic machinery and functions during the earliest  
33 stages of CME (Mettlen et al., 2018). Inactive, closed AP2 is initially recruited to the cytosolic  
34 face of the plasma membrane through its interaction with Phosphatidylinositol-4,5-bisPhosphate  
35 (PIP<sub>2</sub>) (Collins et al., 2002; Höning et al., 2005). At the plasma membrane, conformational  
36 rearrangement of AP2 to an active, open conformation is promoted by membrane-associated  
37 uniscin proteins (Henne et al., 2010; Hollopeter et al., 2014; Umasankar et al., 2014) (Figure  
38 1A). Conversion of AP2 to the open conformation exposes a second binding site for PIP<sub>2</sub> that  
39 stabilizes membrane engagement (Kadlecova et al., 2017), and also reveals binding sites for  
40 clathrin and membrane-embedded cargo (Jackson et al., 2010; Kelly et al., 2014). These  
41 interactions allow AP2 to function as the central regulatory hub of clathrin-coated vesicle  
42 formation (Kirchhausen et al., 2014).

43 After opening, AP2 is phosphorylated on the mu subunit (Conner et al., 2003; Jackson et  
44 al., 2003; Pauloin et al., 1982), but the role of this mark remains poorly defined, in part because  
45 no structures have yet visualized the phosphorylated threonine. Some data suggest that  
46 phosphorylation of AP2 enhances binding to PIP<sub>2</sub> and cargo (Fingerhut et al., 2001; Höning et  
47 al., 2005; Ricotta et al., 2002). Additionally, mutation of the phosphorylated threonine (mu  
48 T156A) or addition of kinase inhibitors have been shown to inhibit transferrin uptake in tissue  
49 culture (Olusanya et al., 2001), implying that phosphorylation promotes AP2 activity. Two  
50 kinases have been shown to phosphorylate AP2 (mu T156) *in vitro*: AP2-Associated Kinase

51 (AAK1) (Conner and Schmid, 2002) and cyclin-G associated kinase (GAK) (Umeda et al.,  
52 2000). Curiously, studies involving these kinases suggest that phosphorylation may function in  
53 an inactivation pathway, as AAK1 appears to inhibit endocytosis using *in vitro* assays (Conner  
54 and Schmid, 2002), and GAK seems to function in vesicle uncoating (Taylor et al., 2011).  
55 Whether phosphorylation is an activating or inactivating mark, and whether it functions in  
56 multiple stages in the endocytic pathway remains to be determined.

57         While the pathways of clathrin adaptor activation have been well characterized both  
58 structurally and biochemically (Collins et al., 2002; Kelly et al., 2008, 2014; Jackson et al., 2010;  
59 Ren et al., 2013; Jia et al., 2014), it is unknown whether inactivation of AP2 is also a regulated  
60 process. Adaptor inactivation likely occurs throughout the endocytic cycle. High-resolution  
61 imaging reveals that many endocytic pits abort prematurely, presumably when a requirement for  
62 activation is unmet, such as an absence of PIP<sub>2</sub>, cargo, or muniscin (Cocucci et al., 2012;  
63 Kadlecova et al., 2017). Abortive events could represent a mechanism to limit futile vesicle  
64 formation in the absence of cargo or prevent ectopic budding from off-target membranes lacking  
65 PIP<sub>2</sub>. Additionally, when adaptors are removed from vesicles prior to fusion with target  
66 organelles, they must also revert to the cytosolic, inactive state. Adaptor uncoating appears to  
67 require PIP<sub>2</sub> phosphatase activity (Cremona et al., 1999; He et al., 2017), but it is not known  
68 whether PIP<sub>2</sub> hydrolysis is sufficient to uncoat AP2, as cytosol and ATP are required *in vitro*  
69 (Hannan et al., 1998). It remains to be determined whether adaptor inactivation occurs via  
70 stochastic disassembly of endocytic pits (Ehrlich et al., 2004), or if it is driven by regulated  
71 mechanisms, such as an endocytic checkpoint to ensure cargo incorporation (Loerke et al., 2009;  
72 Puthenveedu and von Zastrow, 2006).

73           We recently found that NECAP appears to act as a negative regulator of AP2 *in vivo*  
74 (Beacham *et al.*, 2018). NECAP is a coat-associated protein that binds to the alpha appendage  
75 and beta linker regions of AP2 to facilitate endocytic accessory protein recruitment to sites of  
76 endocytosis (Ritter *et al.*, 2003, 2004, 2007, 2013). In *C. elegans*, loss of the muniscin, *fcho-1*,  
77 causes AP2 to dwell in an inactive, closed state (Hollopeter *et al.*, 2014). Deletion of the gene  
78 encoding NECAP (*ncap-1*) in *fcho-1* mutants restores AP2 to an active, open and phosphorylated  
79 state, suggesting that NECAP counterbalances AP2 activation. Consistent with this model,  
80 NECAP binds open and phosphorylated AP2 complexes *in vitro*, however it is unclear how  
81 NECAP recognizes the open and phosphorylated states and whether NECAP can directly close  
82 these complexes.

83           Here, we determined cryo-EM structures of NECAP-AP2 complexes which show that  
84 NECAP clamps AP2 complexes into the closed, inactive conformation. This mechanism requires  
85 coincident binding of two domains of NECAP, one of which confers specificity for open  
86 complexes, and another that detects AP2 phosphorylation. Our structures are supported by *in*  
87 *vitro* biochemistry along with functional assays and unbiased genetic screens in *C. elegans*.  
88 Importantly, the site of AP2 phosphorylation is directly bound by NECAP, defining  
89 phosphorylation as a key step in the dynamic regulation of AP2 inactivation.

90

## 91 **Results**

### 92 **Structural basis for recognition of phosphorylated AP2 by NECAP**

93           We previously demonstrated that NECAP binds to the phosphorylated AP2 core  
94 (Beacham *et al.*, 2018). NECAP is a ~29 kDa, soluble protein composed of three domains: an N-  
95 terminal Pleckstrin Homology with ear-like function (NECAP<sub>PHear</sub>), a central Extended region of

96 conservation (NECAP<sub>Ex</sub>), and a C-terminal domain with low conservation (NECAP<sub>Tail</sub>) (Figure  
97 1B) (Ritter et al., 2007, 2013). To narrow down which domain of NECAP binds phosphorylated  
98 AP2, we performed *in vitro* pulldown assays using NECAP truncations and phosphorylated AP2  
99 cores lacking appendages (phosphoAP2; rodent; boxed in Figure 1A). Our analysis showed that  
100 NECAP<sub>PHear</sub> is necessary and sufficient to bind phosphorylated AP2 *in vitro* (Figure 1C).

101       Phosphorylation is thought to stabilize the open conformation of AP2 and we previously  
102 showed that NECAP can bind open AP2 that is not phosphorylated. To understand whether  
103 NECAP binds to the site of phosphorylation or a conformation induced by phosphorylation, we  
104 determined a ~3.2 Å cryo-EM structure of the phosphorylated AP2 core bound to full-length  
105 NECAP2 (mouse; Figure 1D, Figure 1—figure supplement 1, Figure 1—figure supplement 2,  
106 Table 1). Globally, AP2 has adopted a conformation similar to the crystal structure of the closed  
107 complex (PDB 2VGL; Figure 1—figure supplement 2A) (Collins et al., 2002), which is inactive  
108 due to the occlusion of binding sites for cargo and the plasma membrane. We observe density for  
109 the entire AP2 core, with additional density contacting the mu subunit (Figure 1—figure  
110 supplement 2A). Most of this additional density can be attributed to NECAP<sub>PHear</sub>, due to  
111 similarity with a solution NMR structure of the mouse NECAP1 PHear domain (PDB 1TQZ;  
112 Figure 1—figure supplement 2B, C) (Ritter et al., 2007). The remaining unassigned density at  
113 this interface extends from the amino terminus of residue 159 of mu, and can be attributed to the  
114 phosphorylated mu linker (amino acids 154-158, Figure 1—figure supplement 2C). Our structure  
115 is of sufficient quality to build a near-complete molecular model for the phosphoAP2-NECAP  
116 complex, which shows that residues in NECAP<sub>PHear</sub> interact directly with the phosphorylated mu  
117 T156 (pT156; see Figure 3B below). These data show that the phosphorylated complex can exist

118 in a closed conformation and suggest that the mechanism of NECAP binding to open complexes  
119 that are not phosphorylated must be fundamentally different.

120

### 121 **A genetic screen in *C. elegans* identifies mutations that disrupt the NECAP-AP2 interface**

122 Our structural data using vertebrate proteins imply that NECAP<sub>PHear</sub> and its interaction  
123 with mu pT156 is central to the function of NECAP. To test this hypothesis, we turned to *C.*  
124 *elegans*, where we devised a genetic strategy to specifically isolate critical residues required for  
125 NECAP interaction with AP2, while avoiding mutations that destabilize the NECAP protein  
126 (Figure 2A). This screen was based on our previous screen for mutations that suppressed the  
127 morphological and fitness defects of *fcho-1* mutants and restored the active, open state of AP2.  
128 In the original screen, the predominant mutations identified were either gain-of-function  
129 mutations in AP2 subunits that destabilize the closed conformation (Hollopeter et al., 2014) or  
130 null mutations in the gene encoding NECAP, *ncap-1* (Beacham et al., 2018). To identify rare  
131 mutations that specifically disrupt the functional interface between AP2 and NECAP, we  
132 repeated the screen with a fluorescent tag on NECAP to enable secondary classification of  
133 suppressed animals based on fluorescent hallmarks (Figure 2A). Because gain of function  
134 mutations in AP2 result in NECAP recruitment to the nerve ring, a membranous tissue with a  
135 high concentration of AP2 (Beacham et al., 2018), we visually eliminated suppressed animals  
136 that had fluorescent nerve rings. We also eliminated suppressed animals that were no longer  
137 fluorescent, as these likely harbored null mutations in NECAP. We reasoned that the remaining  
138 animals, which suppressed *fcho-1* phenotypes without altering the fluorescent signal, might  
139 possess missense mutations that prevented NECAP from binding AP2. Worms that met these  
140 requirements were selected, and the genes encoding NECAP and AP2 were sequenced. We

141 isolated mutations in NECAP<sub>PHear</sub> and AP2 mu that were previously proposed to disrupt  
142 NECAP-AP2 interaction, as well as new potential interface mutations in the AP2 alpha and beta  
143 subunits (Figure 2B and 2C). Strikingly, the overwhelming majority of mutations (8 out of 13)  
144 isolated were in mu T156, suggesting that phosphorylation of this residue generates the substrate  
145 for NECAP activity.

146

### 147 **Coordination of phosphorylated AP2 by NECAP is required for inactivation**

148 To understand how the mutated residues isolated in our screens disrupt NECAP function,  
149 we mapped the vertebrate equivalents onto our cryo-EM structure (Figure 3A, B). Mutations of  
150 T156 itself disable phosphorylation completely, and the two residues in NECAP<sub>PHear</sub> (A32 and  
151 S87) lie within 10 Å of mu T156, which suggests that they disrupt coordination of the phosphate  
152 group and explains how they might break the AP2-NECAP interaction *in vivo* (throughout the  
153 text, all residue numbers are for vertebrate proteins, see Figure 2C for *C. elegans* equivalents).  
154 We also noticed that NECAP R112 forms electrostatic interactions with the T156  
155 phosphorylation mark and may be required for binding (Figure 3B). To test the hypothesis that  
156 coordination of mu T156 phosphorylation is necessary for NECAP function, we introduced these  
157 mutations into recombinant vertebrate complexes and *C. elegans* strains and tested each using a  
158 panel of *in vitro* and *in vivo* assays.

159 As predicted, mutation of NECAP R112 disrupted binding *in vitro*, similar to either  
160 mutations in the mu linker (T156A) or NECAP<sub>PHear</sub> (S87N) (Figure 3C). Consistent with the  
161 screen, the mutations suppressed the morphological and fitness defects of *fcho-1* mutants, as  
162 quantified by the number of days for a population to expand and consume a food source (Figure  
163 3D). Furthermore, all three mutations reduced NECAP recruitment to the *C. elegans* nerve ring

164 (Figure 3E) and resulted in accumulation of open AP2 complexes according to an *in vivo*  
165 protease sensitivity assay (Figure 3F). Together, our data show that NECAP<sub>PHear</sub> binding to the  
166 phosphorylated threonine dictates AP2 inactivation.

167 While the AP2-NECAP<sub>PHear</sub> interface is clearly important for inactivation, our cryo-EM  
168 structure does not explain why. NECAP<sub>PHear</sub> only contacts the mu subunit of AP2, and there are  
169 no clashes when mu-NECAP<sub>PHear</sub> is modeled as a rigid body into the crystal structure of open  
170 AP2 (PDB 2XA7; Figure 3—figure supplement 1). Additionally, NECAP<sub>PHear</sub> does not block  
171 cargo- or PIP<sub>2</sub>-binding sites and no obvious steric clashes would prevent AP2 from transitioning  
172 between open and closed states when bound to NECAP<sub>PHear</sub> (Figure 3—figure supplement 1).  
173 One feature that might prevent NECAP<sub>PHear</sub> binding to the open conformation is that mu T156 is  
174 packed against the beta subunit of AP2 in this structure (Figure 3—figure supplement 1C)  
175 (Jackson et al., 2010). This suggests that release and phosphorylation of the mu linker are  
176 important regulatory steps in NECAP recruitment. Nonetheless, while NECAP<sub>PHear</sub> is required to  
177 inactivate AP2, binding of NECAP<sub>PHear</sub> alone does not explain inactivation. Because mutations in  
178 NECAP<sub>PHear</sub> do not disrupt binding to open, non-phosphorylated AP2 complexes (Beacham et  
179 al., 2018), we believe another domain of NECAP may contribute to its function.

180

## 181 **Membrane mimetics stimulate opening of AP2**

182 To understand how NECAP recognizes open AP2 in the absence of phosphorylation, we  
183 needed to control and measure the conformation of AP2 *in vitro*. We used structural data to  
184 engineer a protease site on AP2 that is preferentially cleaved in the open state (Aguilar et al.,  
185 1997; Hollopeter et al., 2014; Matsui and Kirchhausen, 1990) (Figure 4A) and introduced a  
186 mutation in the mu subunit (mu E302K) that is known to promote the open conformation



187 (Hollopeter et al., 2014). Despite this mutation, our AP2 complexes remained largely protease  
188 insensitive (i.e. closed) in the absence of other factors (Figure 4B). To produce open AP2, we  
189 turned to the observation that binding of AP2 to cargo is dramatically stimulated by the addition  
190 of long chain heparin (Jackson et al., 2010). Long anionic polymers are hypothesized to mimic  
191 negatively-charged PIP<sub>2</sub>-containing membranes. To test whether these types of negatively  
192 charged macromolecules could affect AP2 conformation, we included them in our protease  
193 sensitivity assay. Indeed, two anionic polymers, heparin and nucleic acids, generated protease-  
194 sensitive complexes, suggesting that they stimulated a conformational rearrangement of AP2 to  
195 the open state (Figure 4B). Importantly, the PIP<sub>2</sub> mimetic, inositol hexakisphosphate (IP6),  
196 blocks the stimulatory effect of DNA on AP2, suggesting that polymers engage known PIP<sub>2</sub>  
197 binding sites (Figure 4B).

198 We confirmed that our protease-sensitivity assay was reporting structural changes using  
199 2D classification of AP2 cryo-EM images. In the absence of a DNA oligo, both mu E302K and  
200 wild-type AP2 adopted a conformation that matches the crystal structure of the closed complex  
201 (PDB 2VGL; Figures 4C-4E). In the presence of an anionic membrane mimetic (47 nucleotide  
202 DNA), ~60% of wild type and more than 90% of AP2 (mu E302K) particles were open (Figures  
203 4C-4E, Figure 4—figure supplement 1). On the basis of these results we refer to AP2 (mu  
204 E302K) in the presence of anionic polymer as ‘open AP2’ in our experiments. In addition, this  
205 cryo-EM data suggests that the membrane itself affects the conformational equilibrium of AP2  
206 and demonstrates that we can control the conformation of AP2 *in vitro* using a defined chemical  
207 substrate. Using our method to generate open AP2, we confirmed that NECAP bound these  
208 complexes in the absence of phosphorylation (Figure 4F).

209

## 210 **NECAP<sub>Ex</sub> recognizes membrane-activated AP2**

211 To identify the domain of NECAP that engages open AP2, we tested NECAP truncations  
212 (Figure 1B) and found that NECAP<sub>Ex</sub> was necessary and sufficient for binding (Figure 5A). This  
213 supports previous data that binding of NECAP<sub>PHear</sub> to AP2 in rat brain lysate is enhanced by the  
214 presence of NECAP<sub>Ex</sub> (Ritter et al., 2013) and explains why NECAP<sub>PHear</sub> mutants retain this  
215 binding (Beacham *et al.*, 2018). Because the open state of AP2 precedes phosphorylation  
216 (Conner et al., 2003; Hollopeter et al., 2014), we hypothesize NECAP<sub>Ex</sub> may form an initial  
217 priming interaction with open AP2 prior to phosphorylation.

218 To visualize NECAP bound to an activated, phosphorylated AP2 complex, we  
219 determined a  $\sim 3.5$  Å structure of phosphorylated AP2 (mu E302K) bound to full-length  
220 NECAP2 in the presence of an anionic polymer (DNA) (Figures 5B, Figure 5—figure  
221 supplement 1, Table 1). In contrast to other AP2 (mu E302K) complexes incubated with DNA,  
222 (Figures 4B and 4E), AP2 was not open, but was in a closed, inactive conformation. As in our  
223 previous phosphoAP2-NECAP structure, NECAP<sub>PHear</sub> was bound to the mu subunit, coordinating  
224 pT156. However, in this new structure we observed additional density contacting the beta  
225 subunit (Figure 5B). Comparing isosurface threshold levels of the unsharpened, refined map  
226 clearly shows that this density is contiguous and extends from the C-terminus of NECAP<sub>PHear</sub>  
227 (Figure 6—figure supplement 1), suggesting it represents NECAP<sub>Ex</sub>. Because we cannot assign a  
228 definitive sequence register to the NECAP<sub>Ex</sub> density in this structure, we model the most ordered  
229 region as a poly-alanine peptide. We believe this structure may represent a post-open, inactive  
230 conformation of the AP2 complex, corresponding to phospho-AP2 simultaneously bound by  
231 NECAP and partially engaged with the membrane via the PIP<sub>2</sub> pocket on the alpha subunit. We  
232 refer to this structure as ‘clamped’ phosphoAP2-NECAP.

233           While NECAP<sub>Ex</sub> appears to make extensive contact with the beta subunit of AP2 in this  
234 structure, the differences in AP2 conformation that might account for the appearance of the  
235 NECAP<sub>Ex</sub> binding site are subtle (relative to that lacking DNA, Figure 1D, which we refer to as  
236 ‘unclamped’ phosphoAP2-NECAP). The region with the greatest structural changes is the alpha-  
237 beta interface, with several helices in the C-terminus of alpha shifting ~1-3 Å (Figure 5—figure  
238 supplement 2). Additionally, an alpha helix in beta that is part of the Ex domain binding site  
239 appears to partially melt when the Ex domain is bound (Figure 5—figure supplement 2B).  
240 Ordered density for DNA is not seen at any of the known PIP<sub>2</sub> binding sites, consistent with  
241 observations that PIP<sub>2</sub> binding sites are not ordered pockets but rather a collection of basic  
242 residues that protrude into the solvent (Owen et al., 2004). Notably, phosphoAP2-NECAP binds  
243 to the single-stranded DNA construct used in this experiment with an affinity of ~60 nM (Figure  
244 4—figure supplement 1), suggesting that our sample is > 95% bound to DNA at the  
245 concentrations used to make cryo-EM grids (3 μM protein, 15 μM DNA). Importantly, only the  
246 PIP<sub>2</sub> binding site on the alpha N-terminus is solvent-exposed in the clamped conformation, so the  
247 structural consequences of membrane engagement are fundamentally different in the open  
248 (several exposed membrane binding sites) versus the closed (a single membrane binding site)  
249 conformations.

250           After our cryo-EM structure revealed the NECAP<sub>Ex</sub> binding site, we sought to understand  
251 the functional consequences of this interaction. Intriguingly, our genetic screen provided an  
252 unexpected insight, as it identified two mutations in the AP2 alpha and beta subunits that escape  
253 inactivation by NECAP and are in close proximity to the NECAP<sub>Ex</sub> binding site (Figure 2, Figure  
254 6A). Purified AP2 complexes with these mutations have reduced affinity for NECAP *in vitro*  
255 (Figure 6B). Additionally, mutation of the most conserved residues of the NECAP<sub>Ex</sub> domain

256 results in loss of binding to open AP2 (Figure 6B) (Ritter et al., 2013). All three of these  
257 mutations recapitulate the NECAP knockout phenotype in our *in vivo* fitness assay (Figure 6C),  
258 imaging assay (Figure 6D), and protease sensitivity assay (Figure 6E). These data support the  
259 conclusion that NECAP<sub>Ex</sub> specifically recognizes membrane-activated AP2.

260

### 261 **NECAP clamps AP2 in a closed, inactive conformation**

262 Our structural, genetic, and biochemical data suggest a mechanism whereby NECAP  
263 clamps AP2 in a closed, inactive conformation via simultaneous engagement of the mu and beta  
264 subunits. We tested this hypothesis using our *in vitro* protease sensitivity assay. We incubated  
265 open phosphoAP2 with NECAP and found that including NECAP decreases the protease  
266 sensitivity of AP2, consistent with the closed conformation observed in our structure (Figure 7A,  
267 top). Additionally, by comparing various truncations of NECAP we found that both NECAP<sub>PHear</sub>  
268 and NECAP<sub>Ex</sub> were required for this activity (Figure 7A). When we measured the protease  
269 sensitivity of endogenous AP2 in *C. elegans* expressing NECAP truncations, we saw a similar  
270 dependence on NECAP<sub>PHearEx</sub> for full function (Figure 7A, bottom). Additionally, we observed  
271 that NECAP<sub>PHearEx</sub> was sufficient to rescue a NECAP deletion in worms using our whole animal  
272 fitness assay (Figure 7B). Taken together, these data show that NECAP<sub>PHearEx</sub> locks AP2 into an  
273 inactivated conformation.

274

### 275 **Discussion**

276 Our combination of genetic, biochemical, and structural data supports a mechanism by  
277 which NECAP inactivates AP2 by initially recognizing open, unphosphorylated complexes and  
278 promoting the closed, inactive conformation after phosphorylation (Figure 7C). Previous work in

279 vertebrate tissue culture suggests that NECAP<sub>Tail</sub> mediates binding of AP2 through the alpha  
280 appendage (Ritter et al., 2003). However, NECAP<sub>Tail</sub> is poorly conserved in *C. elegans* (Figure  
281 1B) and is dispensable for activity in our assays (Figure 7A, B) (Beacham et al., 2018). This  
282 suggests that we have found an additional and perhaps more ancient activity of NECAP, by  
283 which the conserved NECAP<sub>PHear</sub> and NECAP<sub>Ex</sub> domains cooperate to stabilize the closed  
284 conformation of AP2 in a three-step cycle (Figure 7C). First, AP2 complexes are recruited to the  
285 plasma membrane where PIP<sub>2</sub> and other activators induce the opening and stabilization of the  
286 complex (Höning et al., 2005). Next, NECAP<sub>Ex</sub> recognizes open AP2 complexes and binds to the  
287 beta subunit, placing NECAP<sub>PHear</sub> close to AP2 at a high local concentration. Finally, after AP2  
288 phosphorylation, NECAP<sub>PHear</sub> engages the mu subunit of AP2 to clamp the complex in a state  
289 resistant to activation (Figure 7). Our data confirm this complex is closed despite the otherwise  
290 activating signal of membrane mimetics (Figure 5B) and is resistant to proteolysis (Figure 7A).  
291 Importantly, this inactivation cycle has a strong dependence on phosphorylation of AP2 (Figure  
292 3), suggesting that inactivation of AP2 is a tightly regulated mechanism.

293         While we have uncovered new molecular details of how an endocytic regulator can  
294 inactivate the AP2 complex, how this process is controlled both spatially and temporally remains  
295 an open question. One possibility is that NECAP action is dictated by the timing of AP2 kinase  
296 recruitment or activation (Conner et al., 2003; Jackson et al., 2003) and that AP2 complexes  
297 become inactivated by NECAP immediately upon phosphorylation. Another possibility is that  
298 NECAP cannot inactivate stabilized AP2 complexes, but only complexes that are not yet fully  
299 initiated, thereby serving as a quality control mechanism (Aguet et al., 2013; Cocucci et al.,  
300 2012; Ehrlich et al., 2004; Puthenveedu and von Zastrow, 2006). However, NECAP is reported  
301 at endocytic structures (Sochacki et al., 2017) coincident with the arrival of clathrin (Taylor et

302 al., 2011), suggesting that NECAP may act later in the endocytic cycle, after AP2 activation.  
303 More speculatively, it is possible that clathrin adaptor inactivation may be involved in vesicle  
304 uncoating, as closed AP2 complexes cannot interact with cargo (Collins et al., 2002; Jackson et  
305 al., 2010; Kelly et al., 2008) and a clathrin-binding motif on the beta hinge is occluded in this  
306 conformation (Kelly et al., 2014). It is also not clear whether NECAP has functions apart from  
307 regulation of AP2. For example, the phosphorylated threonine of the AP2 mu subunit is  
308 conserved on the mu subunit of AP1 (Ghosh and Kornfeld, 2003; Heldwein et al., 2004; Ren et  
309 al., 2013) and NECAP has been proposed to both interact with and control AP1 (Chamberland et  
310 al., 2016; Ritter et al., 2004). This suggests a broader role for NECAP and regulated adaptor  
311 inactivation at other membrane compartments.

312 **Acknowledgments:** We thank E. Shen for help with cloning and protein purification; A. Joiner,  
313 R. Feathers, and C. Fromme for preliminary negative stain EM; B. Brown, C. Adler, R. Collins,  
314 and H. Aguilar-Carreno for use of equipment; H Sondermann and W. Greentree for technical  
315 advice; F. Hughson, C. Fromme, R. Cerione, and C. Adler for comments to improve the  
316 manuscript; UCSD Cryo-Electron Microscopy Facility, which is supported in part by NIH grants  
317 to Dr. Timothy S. Baker and a gift from the Agouron Institute to UCSD; UCSD Physics  
318 Computing Facility for IT support; Cornell University Biotechnology Resource Center, which is  
319 supported by instrument grants NYSTEM CO29155 and NIH S10OD018516.

320 **Funding:** This work was supported by a National Institutes of Health grant R01 GM127548-  
321 01A1. R.W.B. is a Damon Runyon Fellow supported by the Damon Runyon Cancer Research  
322 Foundation DRG-#2285-17. G.M.B. and E.A.P. were supported by an NIH training grant  
323 GM007273-43. G.M.B. is supported by an NSF graduate research fellowship DGE-1650441.  
324 J.S.C. is a Meinig Family Investigator in the Life Sciences.

325 **Declaration of interests:** The authors declare no competing interests.

326 **Figure titles and legends**

327 **Figure 1. NECAP PHear domain binds phosphorylated AP2 core.**

328 (A) AP2 comprises four subunits: alpha ( $\alpha$ ), beta ( $\beta$ ), mu ( $\mu$ ), and sigma ( $\sigma$ ). The complex also  
329 comprises a structured ‘core’ (dashed box) connected by flexible linkers to appendages on the  
330 alpha and beta subunits. Binding sites for AP2 substrates are indicated. PIP<sub>2</sub>,  
331 Phosphatidylinositol-4,5-bisPhosphate. (B) (Top) NECAP domain organization (numbers are for  
332 human NECAP2). (Center) Conservation scores of NECAP residues calculated using the  
333 ConSurf server (Ashkenazy et al., 2010; Celniker et al., 2013). (Bottom) Truncation constructs  
334 used in this work. (C) Binding analysis of NECAP truncations compared to HaloTag control (-).  
335 HT, HaloTag; phosphoAP2, phosphorylated AP2 core. Representative image of three technical  
336 replicates. (D) Cryo-EM map of the phosphoAP2-NECAP complex (PDB 6OWO). Red:  
337 NECAP; Blue: AP2 mu; Grey: AP2 alpha, beta, sigma. See also Figure 1—figure supplement 1  
338 and Figure 1—figure supplement 2.

339

340 **Figure 2. Genetic screen for NECAP-AP2 interface mutations.**

341 (A) Schematic of genetic screen to identify residues important for AP2-NECAP binding. FCHO  
342 mutants (*fcho-1*) exhibit growth defect and ‘jowls’ phenotype due to inactive AP2 (cartoon is  
343 anterior of worm). Fluorescent tag on NECAP (RFP:NECAP) enables visual categorization of  
344 suppressor mutations that restore AP2 activity. (B) Mutations identified in (A) mapped as red  
345 spheres onto the subunits of the closed AP2 crystal structure (2VGL) and our NECAP<sub>PHear</sub> cryo-  
346 EM structure (PDB 6OWO). (C) Table of *C. elegans* mutations and their vertebrate equivalents  
347 referenced in this manuscript.

348



349

350 **Figure 3. Coordination of phosphorylated AP2 by NECAP is required for inactivation.**

351 (A) Cryo-EM of phosphoAP2-NECAP complex, boxed region shown in (B). (B) phosphoAP2-  
352 NECAP interface as a ribbon diagram inside a transparent rendering of the cryo-EM map with  
353 ball-and-stick representation of relevant NECAP side chains and mu pT156. Red: NECAP; Blue:  
354 AP2-mu. See also Figure 3—figure supplement 1. (C) Binding analysis of interface mutants  
355 compared to HaloTag control (–). HT, HaloTag. Representative image of two technical  
356 replicates. (D) In the absence of NECAP (–), *fcho-1* mutants take about 4 days to proliferate and  
357 consume a bacterial food source (fitness defect = 0). Expression of NECAP (+) increases the  
358 number of days to about 8 (fitness defect = 1). Data for interface mutants were normalized to this  
359 fitness defect; n = 10 biological replicates. (E) (Left) In *fcho-1; apm-2 (E306K)* mutant worms,  
360 NECAP is recruited to the nerve ring. Interface mutants disrupt nerve ring recruitment, as  
361 quantified by *in vivo* confocal microscopy. (Right) Normalized RFP intensities plotted above  
362 representative confocal nerve ring images of ten biological replicates. (D-E) Error bars indicate  
363 mean ± SEM. Significance compared to NECAP (+); Student's t-test performed on raw data (D)  
364 or normalized data (E). \*P < 0.05, \*\*P < 0.01, \*\*\*P < 0.001, \*\*\*\*P < 0.0001. (F) *In vivo*  
365 protease sensitivity assay to probe AP2 conformation in genetic backgrounds indicated. In the  
366 absence of NECAP (–), AP2 is protease sensitive (open). Expression of wild type NECAP (+)  
367 results in protease resistant AP2 (closed). All strains lack *fcho-1*.

368 **Figure 4. Membrane mimetics stimulate opening of AP2.**

369 (A) Schematic of protease sensitivity assay. Open AP2 exposes thrombin site on mu. K, mu  
370 E302K mutation. (B) Protease sensitivity of AP2 (mu E302K) in the presence of anionic  
371 polymers. Oligo, 60 nucleotide single-stranded DNA; plasmid, double-stranded DNA; RNA,  
372 total yeast RNA; IP6: inositol hexakisphosphate. (C) AP2 crystal structures (left, PDB 2VGL;  
373 right, PDB 2XA7) (D) (Top) Representative AP2 cryo-EM 2D class averages in the absence  
374 (left) or presence of oligo (47 nucleotide single-stranded DNA, right). (Bottom) Images from  
375 above overlaid with closed (left) or open (right) AP2 crystal structures. Blue: AP2 mu. The C-  
376 terminal domain of mu was omitted from the open crystal structure, as it is disordered in our  
377 cryo-EM class averages. (E) Proportion of AP2 particles assigned to either closed (grey) or open  
378 (blue) class averages. Data represents ten technical replicates (see definition of technical  
379 replicates for this assay in methods). See also Figure 4—figure supplement 1. (F) Binding  
380 analysis of NECAP to AP2 (mu E302K) in the presence or absence of heparin. HT, HaloTag; K,  
381 mu E302K mutation. HaloTag control (-). Representative image of three technical replicates.  
382

383 **Figure 5. NECAP<sub>Ex</sub> recognizes membrane-activated AP2.**

384 (A) Binding analysis of NECAP truncations to AP2 (mu E302K) in the presence of heparin.  
385 HaloTag control (-). Representative image of two technical replicates. (B) Cryo-EM density of  
386 the phosphorylated AP2 (mu E302K)-NECAP complex in the presence of oligo (PDB 6OXL, 47  
387 nucleotide single-stranded DNA, 5 molar excess). See also Figure 5—figure supplement 1,  
388 Figure 5—figure supplement 2.

389

390

391 **Figure 6. The AP2-NECAP<sub>Ex</sub> interface is required for inactivation.**

392 (A) Residues identified in our genetic screen (see Figure 2) shown as colored spheres on a ribbon  
393 diagram of AP2 with outline of NECAP<sub>Ex</sub> density (red, low isosurface threshold, see Figure 6—  
394 figure supplement 1). (B) Binding curves generated from pulldown depletion assays. Error bars  
395 represent mean  $\pm$  SEM from three technical replicates. Inset: Calculated  $K_d$  values, variance is  
396 SEM. \* $P < 0.05$ , \*\* $P < 0.01$ , relative to control. (C) In the absence of NECAP (–), *fcho-1*  
397 mutants take about 4 days to proliferate and consume a bacterial food source (fitness defect = 0).  
398 Expression of NECAP (+) increases the number of days to about 8 (fitness defect = 1). Data for  
399 interface mutants were normalized to this fitness defect;  $n = 10$  biological replicates. (D) In *fcho-*  
400 *1*; *apm-2* (*E306K*) mutant worms, NECAP is recruited to the nerve ring. Interface mutants  
401 disrupt nerve ring recruitment. Normalized RFP intensities plotted above representative confocal  
402 nerve ring images of ten biological replicates. (C-D) Error bars indicate mean  $\pm$  SEM.  
403 Significance compared to NECAP (+); Student's t-test performed on raw data (C) or normalized  
404 data (D). \* $P < 0.05$ , \*\* $P < 0.01$ , \*\*\* $P < 0.001$ , \*\*\*\* $P < 0.0001$ . (E) *In vivo* protease sensitivity  
405 assay to probe AP2 conformation in genetic backgrounds indicated. In the absence of NECAP  
406 (–), AP2 is protease sensitive (open). Expression of wild type NECAP (+) results in protease  
407 resistant AP2 (closed). All strains lack *fcho-1*. See also Figure 6—figure supplement 1.

408

409 **Figure 7. NECAP clamps AP2 in a closed, inactive conformation.**

410 (A) Analysis of NECAP activity on AP2 protease sensitivity. (Left) Schematic of components.  
411 Oligo, 60 nucleotide single-stranded DNA. (Center) Samples analyzed by western blot to  
412 quantify cleavage of mu subunit. (Right) Western blots cropped to show uncut mu subunit after  
413 either addition of protease (*in vitro*, top) or protease expression via heat shock promoter (*in vivo*,

414 bottom). Numbers represent normalized intensity of the uncut mu band, relative to the sample  
415 with full length NECAP. (B) In the absence of NECAP (-), *fcho-1* mutants take about 4 days to  
416 proliferate and consume a bacterial food source (fitness defect = 0). Expression of NECAP (Full  
417 length) increases the number of days to about 8 (fitness defect = 1). Data for the truncations were  
418 normalized to this fitness defect; n = 10 biological replicates. \*\*\* $P < 0.001$ ; ns, not significant;  
419 relative to NECAP knockout (-). N=10 biological replicates. (C) Model of AP2 inactivation by  
420 NECAP.  
421

422 **Supplemental figure titles and legends**

423 **Figure 1—figure supplement 1. Classification, signal subtraction, and refinement of**  
424 **phosphoAP2 bound to NECAP**

425 (A) Representative 2D class averages demonstrating different particle orientation preferences  
426 under different grid preparation conditions. (B) Processing workflow for 3D classification and  
427 refinement of phosphoAP2-NECAP using the Relion 3 software suite. (C) Cryo-EM map colored  
428 by local resolution (Relion 3). (D) Fourier Shell Correlation (FSC) plot. (E) 3D FSC plot. An  
429 overall sphericity of 0.95 shows that resolution is nearly uniform in three dimensions. (F)  
430 Histogram plot of C $\alpha$  RMSD of top ten molecular models from Rosetta refinement. Inset shows  
431 molecular model colored and scaled by RMSD.

432

433 **Figure 1—figure supplement 2. Comparison of NECAP solution structure and**  
434 **phosphoAP2-NECAP cryo-EM structure**

435 (A) Cryo-EM map of phosphoAP2-NECAP is shown with a solid surface (left) and with a  
436 transparent surface with the closed AP2 crystal structure docked (middle). Masking the region  
437 corresponding to AP2 and subtracting this density from the full map gives a pseudo difference  
438 density map (right). (B) Solution structure of NECAP<sub>PHear</sub> (PDB 1TQZ) docked into the  
439 difference density from (A). NECAP<sub>PHear</sub> comprises a single alpha helix and beta sheet, which  
440 can be clearly seen in the cryo-EM density. However, the solution structure has some  
441 conformational differences compared to the AP2-bound cryo-EM structure. (C) The molecular  
442 model for NECAP<sub>PHear</sub> and AP2 mu (AA 154-158) are shown in the cryo-EM density. PDB  
443 1TQZ was used as a starting model to manually rebuild in Coot and refine using Rosetta.

444

445 **Figure 3—figure supplement 1. Comparison of NECAP binding site in open and closed**  
446 **AP2 conformations.**

447 (A) phosphoAP2-NECAP structure. The mu subunit is colored blue, with residues 154-170  
448 colored cyan, and pT156 colored magenta. NECAP<sub>PHear</sub> is colored red. (B) Model of open AP2  
449 bound to NECAP<sub>PHear</sub> colored as in (A). NECAP<sub>PHear</sub> was docked onto the open AP2  
450 conformation (PDB 2XA7) by aligning the mu homology domain (AA 160-435) of the two  
451 models. The NECAP<sub>PHear</sub> binding site on the mu subunit is solvent exposed in both structures,  
452 except the mu linker packs against beta in the open conformation, including T156. (C) Model of  
453 open AP2 bound to NECAP as shown boxed in (B). The location of muT156 is highlighted for  
454 the phosphoAP2-NECAP structure and the open AP2 structure. While there are no steric clashes  
455 preventing NECAP binding to open AP2, access to and phosphorylation of muT156 is a key  
456 determinant of NECAP binding.

457

458 **Figure 4—figure supplement 1. Cryo-EM analysis of AP2 in the presence of an anionic**  
459 **polymer (DNA).**

460 (A) 2D class averages for WT AP2 + DNA are shown. Averages corresponding to the closed  
461 conformation (red inset) and open conformation (blue inset) are shown next to their respective  
462 molecular models (PDB 2VGL; PDB 2XA7). (B) 3D classification shows that the dataset  
463 contains a mixture of open and closed conformations. Classification was performed in Relion 3.  
464 Resolution is limited for all open structures because of an extreme preferred orientation in the  
465 cryo-EM grids. (C). Representative 2D class averages from AP2 samples. Mutations and the  
466 presence of DNA are labeled. DNA is in a 5-fold molar excess. Closed 2D classes are boxed in  
467 red, open 2D classes are boxed in blue. (D) Binding curve of phosphoAP2 (mu E302K)-NECAP

468 and a 47 bp ssDNA oligo. 20 nM DNA was incubated with increasing amounts of phosphoAP2-  
469 NECAP. A native gel shift assay was used to measure binding. Data was plotted and analyzed  
470 using the Prism software package.

471

472 **Figure 5—figure supplement 1. Cryo-EM data collection, processing, and model building**  
473 **for phosphoAP2-NECAP-DNA ‘clamped’ structure.**

474 (A) Representative motion-corrected, dose-weighted cryo-EM micrographs of phosphoAP2-  
475 NECAP-DNA complex. (B) Classification and refinement pipeline used for structure  
476 determination. Particles were extracted and 2D classified in Relion3. ‘Clean’ particles were re-  
477 extracted and used for ab initio model generation and refinement in cryoSPARC v2. 2D and 3D  
478 FSC plots are shown for the final model. (C) Final cryo-EM structure colored by local resolution.  
479 (D) Histogram plot of C $\alpha$  RMSD of top ten molecular models from Rosetta refinement. Inset  
480 shows molecular model colored and scaled by RMSD.

481

482 **Figure 6—figure supplement 1. The NECAP<sub>Ex</sub> domain binds along the surface of the beta**  
483 **subunit.**

484 (A) The unfiltered, refined cryo-EM map of ‘clamped’ phosphoAP2-NECAP is shown at  
485 different isosurface threshold levels (top). A psuedo difference density map was made in  
486 Chimera by masking the region corresponding to AP2 and subtracting this map from the full map  
487 (bottom). The remaining density is shown colored salmon. The same threshold levels are shown  
488 top and bottom. (B) The psuedo difference density from (A) is shown at a low threshold level  
489 and with a Gaussian filter applied. Regions of the map corresponding to obvious AP2 features,  
490 such as loops omitted from our molecular model, were manually removed in Chimera. We

491 hypothesize that a region of NECAP<sub>Ex</sub> cryo-EM density (boxed in red) corresponds to a  
492 conserved region of the sequence called the KEG motif (AA 153-154) . This is consistent with  
493 structural restraints based on the distance of this motif (16 residues) from the C-terminus of  
494 NECAP<sub>PHear</sub> in our molecular model (AA 8-137).

495

496 **Figure 5—figure supplement 2. Structural comparison of ‘unclamped’ and ‘clamped’**  
497 **phosphoAP2-NECAP structures.**

498 (A) Cartoon diagram of phosphoAP2-NECAP ‘unclamped’ structure. NECAP is not shown.  
499 Top: AP2 subunits are colored as labeled. Bottom: AP2 is colored by per-residue RMSD. Values  
500 were calculated in PyMol using whole-molecule alignment of ‘unclamped’ vs ‘clamped’  
501 phosphoAP2-NECAP. (B) Cryo-EM maps of ‘unclamped’ (top) and ‘clamped’ (bottom)  
502 phosphoAP2-NECAP structures. Maps were locally filtered by local resolution to standardize  
503 comparison between maps. Cryo-EM density corresponding to beta AA 404-474 is shown  
504 (right). Both maps are colored by local resolution using the same color gradient (color key in  
505 (C)). (C) The NECAP<sub>Ex</sub> binding site (beta AA 404-474) is shown for the ‘unclamped’  
506 phosphoAP2-NECAP (top) and ‘clamped’ phosphoAP2-NECAP (bottom) structures. A small  
507 region of beta partially melts when the Ex domain is bound.



508 **MODEL SYSTEM**

509 ***C. elegans* Strains**

510 A complete strain list used in this study is provided in the Key Resources Table.

511 An annotated strains list is included in supplemental file 1.

512 ***C. elegans* maintenance**

513 *C. elegans* were maintained at room temperature (22-25°C) using standard procedures (Brenner,  
514 1974) on nematode growth medium (NGM) plates seeded with *E. coli* strain OP50. All animals  
515 used in this study were larval stage 4 (L4) or young adult (3-4 days old) hermaphrodites.

516

517 **METHOD DETAILS**

518 **Fitness assay**

519 Fitness (starvation) assays were performed as previously described (Hollopeter et al., 2014).

520 Briefly, three young adult *C. elegans* hermaphrodites were placed on NGM plates with bacterial  
521 food source. The number of days for the population of worms to expand and consume the food  
522 was recorded.

523 **Transgenic strains**

524 Generation of transgenic strains by CRISPR was performed as previously described (Beacham et  
525 al., 2018) using ribonucleoprotein complexes (Paix et al., 2015). Injection mixes contained 19  
526 µM recombinant Cas9 nuclease (purified in-house), 30 µM crispr RNA (crRNA) for desired edit

527 (IDT), 35  $\mu$ M trans-activating crRNA (trRNA, IDT), 6  $\mu$ M crRNA targeting the *dpy-10* locus  
528 (IDT), and 2.5  $\mu$ M *dpy-10* (*rol*) single stranded oligo repair template (IDT). For small missense  
529 mutations, 10  $\mu$ M single-stranded oligonucleotide (oligo) DNA repair template (IDT) was  
530 included. For large insertions, such as fluorophores, repair templates (PCR products with 35 base  
531 pair homology arms flanking the Cas9 cleavage site) were included at a final concentration of 1  
532  $\mu$ M. Gonad arms of young adult hermaphrodite *C. elegans* were injected and *rol* F1 offspring of  
533 the injected worms were transferred to a fresh plate, allowed to lay eggs, and genotyped for the  
534 desired edit. Non-*rol* F2 offspring were similarly screened to isolate worms with homozygous  
535 edits. GUN89 was generated using *mos1*-mediated single copy insertion as previously described  
536 (Beacham et al., 2018; Frøkjær-Jensen et al., 2012) by injecting targeting vector pEP57 into *C.*  
537 *elegans* strain EG6703.

### 538 **Mutagenesis screen**

539 *C. elegans* strains GUN61 or GUN88 (*fcho-1* mutants expressing *RFP:NECAP*) were  
540 mutagenized in 0.5 mM N-nitroso-N-ethylurea (ENU, Sigma Aldrich N3385) for 4 hr at 22 °C.  
541 After washing with M9 buffer, animals were distributed onto growth plates (10 cm NGM plates  
542 seeded with concentrated bacterial OP50 culture). Once the worm population had expanded and  
543 consumed the food source,  $\sim 2 \times 2$  cm pieces of each plate were transferred to a fresh growth  
544 plate. This process was repeated 4-6 times to select for genotypes with greater fitness, which  
545 were then visually screened to eliminate *NECAP* knockouts (RFP negative) and open AP2  
546 mutations (nerve-ring-enriched RFP). Genomic regions corresponding to AP2 subunits and  
547 *NECAP* were amplified by PCR and sequenced in candidate interface mutants. To confirm that  
548 the mutations we identified were responsible for the observed phenotypes, we generated them *de*  
549 *novo* using CRISPR.

550 **Recombinant protein purification**

551 *AP2 complex purification*

552 AP2 cores were purified as described previously (Hollopeter et al., 2014) with some  
553 modifications. Plasmids encoding wild type or mutant AP2 cores were expressed in *E. coli*  
554 (BL21 DE3, NEB). To generate phosphorylated AP2 cores, a plasmid encoding the kinase  
555 domain of AAK1 was included. *E. coli* cultures (500-6000 mL) expressing the AP2 cores were  
556 lysed by sonication in 50 mM Tris pH 8.0, 1000 mM NaCl, 10% glycerol, 10 mM MgCl<sub>2</sub>, 1 mM  
557 CaCl<sub>2</sub>, 150 ng/μL lysozyme (Sigma), 24 ng/μL DNase (grade II from bovine pancreas, Roche),  
558 1mM Phenylmethylsulfonyl fluoride (PMSF), and one cOmplete EDTA-free Protease Inhibitor  
559 Cocktail tablet (Roche). Clarified lysate was passed over a column packed with GST resin to  
560 bind AP2. Column was washed with 50 mM Tris pH 8.0, 1000 mM NaCl, 10% glycerol, and 1  
561 mM DTT until optical density at 280 nm (OD<sub>280</sub>) of the flow-through was below 0.05 arbitrary  
562 units (AU). Column was then washed in TBS-DTT (20 mM Tris pH 7.6, 150 mM sodium  
563 chloride, and 1 mM DTT) prior to elution. Complexes were eluted using glutathione elution  
564 buffer (50 mM Tris, 150 mM sodium chloride, 10mM reduced glutathione, 1 mM DTT, final pH  
565 9.0) or treated with GST-HRV protease (purified in-house) to release AP2 from the GST affinity  
566 tag. Eluted complexes were buffer-exchanged with TBS-DTT and concentrated by centrifugal  
567 filtration to 1-5 μM before snap-freezing in liquid nitrogen for long-term storage.

568 *Hexahistidine-tagged (6xHis) protein Purification*

569 Hexahistidine-tagged proteins were purified as described previously (Beacham et al., 2018;  
570 Hollopeter et al., 2014) with some modifications. *E. coli* (BL21 DE3, NEB; 500 mL culture)  
571 expressing hexahistidine-tagged proteins were lysed by sonication in 50 mM Tris pH 8.0, 500

572 mM NaCl, 10% glycerol, 10 mM MgCl<sub>2</sub>, 1 mM CaCl<sub>2</sub>, 150 ng/μL lysozyme (Sigma), 24 ng/μL  
573 DNase (grade II from bovine pancreas, Roche), 1 mM PMSF, and one cComplete EDTA-free  
574 Protease Inhibitor Cocktail tablet (Roche). Clarified lysate was passed over a column packed  
575 with TALON resin (Clontech) to bind the hexahistidine-tagged protein. The column was first  
576 washed with 50 mM Tris pH 8.0, 500 mM NaCl, 10% glycerol, and 5 mM BME until the OD280  
577 of the flow-through was below 0.05 AU. Column was then washed with TBS-BME (20 mM Tris  
578 pH 7.6, 150 mM sodium chloride, and 5 mM BME), and the bound protein was eluted using  
579 TBS-BME supplemented with 150mM imidazole. Proteins were buffer exchanged with TBS-  
580 DTT and concentrated to 100 μM by centrifugal filtration before snap-freezing in liquid nitrogen  
581 for long-term storage.

#### 582 *phosphoAP2-NECAP purification*

583 *E. coli* (BL21 DE3, NEB; 500 - 6000 mL culture) expressing phosphoAP2 core  
584 (pGH504/pGH419/pEP82) or phosphoAP2 (mu E302K) core (pGH504/pGB106/pEP82) were  
585 prepared as in *AP2 complex purification* above, until after the wash steps. Before elution, 10 mg  
586 purified mouse NECAP2:6xHis (pGH503) was flowed over the resin in a total volume of 25 mL  
587 TBS-DTT. Column was washed in 50 mM Tris pH 8.0, 500 mM NaCl, 10% glycerol, 5 mM  
588 BME. The complex was released from the GST affinity tag by incubation with GST-HRV  
589 protease (purified in-house). The phosphoAP2-NECAP complex was further purified using a  
590 column packed with TALON resin to remove AP2 that was not bound to 6xHis-tagged NECAP.  
591 Column was washed with 50 mM Tris pH 8.0, 500 mM NaCl, 10% glycerol, 5 mM BME. The  
592 complex was eluted using 50 mM Tris pH 8.0, 500 mM NaCl, 10% glycerol, and 5 mM BME  
593 supplemented with 150 mM imidazole. The sample was concentrated to OD280 of ~4 AU and  
594 further purified using gel filtration (Superdex 200 Increase 10/300 GL column, General Electric).

595 The sample was buffer exchanged with 20 mM HEPES pH 8.0, 150 mM KCl, 1 mM DTT during  
596 gel filtration. The final complex was concentrated to >10  $\mu$ M before snap-freezing in liquid  
597 nitrogen for long-term storage.

### 598 ***In vitro* pulldowns**

599 Pulldown assays were performed essentially as described (Hollopeter et al., 2014) except the  
600 protease cleavage step was 3-6 hr. For the pulldown assay, 80 pmol of purified HaloTag:NECAP  
601 bait or HaloTag control, 40 pmol of recombinant AP2 prey, and 10  $\mu$ L of Magne HaloTag Bead  
602 slurry (20%, Promega) were mixed in TBS-DTT (1 mL total volume for each pulldown) and  
603 nutated overnight at 4°C. For pulldowns with ‘open AP2’, 100  $\mu$ g heparin was also included.  
604 After incubation, the beads were washed with TBS-DTT and bound proteins were cleaved from  
605 the HaloTag by incubation with TEV protease (purified in-house, 3-6 hr at 22°C). Eluted  
606 proteins were visualized by coomassie-stained sodium dodecyl sulfate polyacrylamide gel  
607 electrophoresis (SDS-PAGE). Images in manuscript are cropped to show the largest AP2 band  
608 for each prey (alpha:GST, or alpha and beta).

### 609 **Pulldown depletion assay**

610 To determine the  $K_d$  of NECAP for open AP2, we measured how much AP2 was precipitated by  
611 various concentrations of immobilized NECAP. Open AP2 (50 nM AP2 mu E302K with 10  
612 ng/ $\mu$ L heparin) was incubated with HaloTag:NECAP2:6xHis (30-3000 nM) and TALON  
613 hexahistidine affinity resin (20  $\mu$ L) in TBS-T (20 mM Tris pH 7.6, 150 mM NaCl with 0.1%  
614 Tween-20, final reaction volume 100  $\mu$ L). Samples were agitated at 1500 rpm for one hour at 22  
615 °C. The resin was allowed to settle and 45  $\mu$ L of the supernatant was analyzed by coomassie-  
616 stained SDS-PAGE.

617 ***In vitro* protease assay**

618 This assay was used to measure the conformation of AP2 complexes *in vitro*. A thrombin  
619 protease site (DNA sequence 5'-ctggtgccgcgcggcagc-3') was inserted into the mu subunit after  
620 residue S236. This protease site becomes exposed when AP2 adopts the open conformation. To  
621 perform the assay, 20 pmol of purified AP2, 3.3µg of activators (oligo DNA, plasmid DNA,  
622 RNA, or heparin), and 50 pmol of HaloTag:NECAP or 50 pmol of HaloTag control were mixed  
623 in 30 µL TBS-DTT. Thrombin protease (Sigma T7009, 3 µL) was then added (see amounts and  
624 timings below). Reactions were incubated at 22° C for 10 minutes (0.25 U thrombin, Figure 4B)  
625 or 30 minutes (0.5 U thrombin, all others) and terminated by addition of 11µL 4X Bolt LDS  
626 Sample Buffer (ThermoFisher) and incubation at 95° C for 5 minutes. Cleavage of the mu  
627 subunit was analyzed by coomassie-stained SDS-PAGE (Figure 4B) or by western blot for the  
628 phosphorylated mu subunit (Figure 7A, top). The primary antibody was rabbit anti-AP2M1  
629 phospho T156 (1:1000, Abcam 109397), and the secondary antibody was goat anti-rabbit Alexa  
630 Fluor 647 (1:2000, Life Technologies, A21244).

631 ***In vivo* protease assay**

632 *In vivo* TEV assays were performed as previously described (Beacham et al., 2018). *C. elegans*  
633 strains used in this assay express heat-shock inducible TEV protease and an AP2 mu transgene  
634 containing a TEV protease site that is exposed specifically when AP2 is in an open  
635 conformation. The strains also express an RFP:NECAP transgene or RFP alone. 100 L4 stage *C.*  
636 *elegans* hermaphrodites were picked from a growth plate either before or 6 hr after a 1 hr heat  
637 shock (34° C). Worms were placed in 1 mL of 20 mM Tris pH 7.6, 150 mM NaCl (TBS) with  
638 0.001% Triton X-100. Animals were pelleted at 1000 g and washed once with TBS containing

639 0.001% Triton X-100. Samples were pelleted again and the supernatant removed, leaving behind  
640 45  $\mu$ L total volume. 15  $\mu$ L 4x Bolt LDS Sample Buffer supplemented with fresh dithiothreitol  
641 (DTT) was added, and sample was snap frozen in liquid nitrogen. Samples were then lysed in a  
642 cup horn sonicator (Branson Ultrasonics Corporation, Danbury, CT; 1 s pulses at 90–95%  
643 amplitude for 2–3 min) followed by heating to 70 °C for 10 minutes. Samples were re-sonicated  
644 following the 70°C denaturation step if any exhibited excessive viscosity. The entire sample was  
645 separated by SDS-PAGE and western blot analysis was performed to detect the 3xFLAG-tagged  
646  $\mu$  subunit. The primary antibody was mouse anti-flag (1:1000, Sigma-Aldrich F3165), and the  
647 secondary antibody was goat anti-mouse IRDye 800CW (1:20000, LI-COR, 925-32210).

#### 648 ***In vivo* imaging assay**

649 Nerve ring imaging was performed as previously described (Beacham et al., 2018) with  
650 modifications to data quantification. Live worms were immobilized on slides and imaged on a  
651 Zeiss LSM 880 confocal microscope with a 40x water immersion objective. Fluorophores were  
652 excited with 488 nm (GFP) and 561 nm (RFP) lasers. Strains for each experiment were imaged  
653 in one session with the same laser settings. For each worm, a single confocal slice through the  
654 approximate sagittal section of the nerve ring was analyzed in Fiji. The GFP-AP2 signal  
655 corresponding to the nerve ring was used to define a region of interest (ROI) for quantification of  
656 ‘nerve ring RFP’. A second ROI in the anterior of the worm that was outside the nerve ring and  
657 pharynx was used for normalization.

#### 658 **Cryo-EM structure determination**

659 The following conditions were used for all cryo-EM samples. Grids were prepared by glow  
660 discharging UltraAuFoil R 1.2/1.3 300 mesh gold grids (Quantifoil GmbH) for 30 seconds at 20

661 mAmp. Grids were used within 10 minutes of charging. 4  $\mu$ L of sample was applied to grids and  
662 plunge frozen in liquid ethane using a Vitrobot Mark IV robot (Thermo Fisher) set to 100%  
663 humidity, 4°C, blot force 20, and blot time 4 s. Samples were imaged using a Talos Arctica TEM  
664 (Thermo Fisher) operating at 200 keV in nano probe mode and equipped with a K2 Summit  
665 Direct Electron Detector (Thermo Fisher). Parallel illumination of the microscope was performed  
666 according to (Herzik et al., 2017). Images were collected at 36,000x, yielding a final pixel size of  
667 1.16 Å for counting mode and 0.58 Å for super resolution mode. Dose fractionated movies were  
668 collected at a defocus range of -0.6  $\mu$ m and -2.5  $\mu$ m and an exposure rate of  $\sim$ 6 e-/pixel/s with  
669 200 ms frames and a total exposure of  $\sim$ 50 e-/Å<sup>2</sup>. New camera gain references were collected  
670 before each dataset and the hardware dark reference was updated daily. The microscope was  
671 operated using the Leginon software suite (Suloway et al., 2005) and data were processed on the  
672 fly using the Appion software suite (Lander et al., 2009), including motion correction and gain  
673 correction using MotionCor2 (Zheng et al., 2017), CTF estimation using CTFFIND4 (Rohou and  
674 Grigorieff, 2015), and particle picking using DogPicker.py (Voss et al., 2009). Particles were  
675 extracted from dose-weighted, aligned micrographs and analyzed using cryoSPARC (Punjani et  
676 al., 2017) and Relion-3 (Nakane et al., 2018). Unless otherwise noted, resolution values are  
677 according to the 0.143 gold standard Fourier shell correlation (GSFSC) method (Scheres, 2012).

#### 678 *phosphoAP2-NECAP cryo-EM structure determination*

679 The phosphorylated AP2 core was purified in complex with full-length mouse NECAP2 using  
680 recombinant expression in *E. coli* and used to make cryo-EM grids (see *phosphoAP2-NECAP*  
681 *purification*, above). The final protein buffer was 20 mM HEPES-KCl, pH 8.0, 150 mM KCl, 1  
682 mM DTT. We noticed that particles had a different orientation in the ice based on protein



683 concentration and/or the presence of a detergent, n-Octyl- $\beta$ -D-Glucopyranoside ( $\beta$ -OG) (Figure  
684 1—figure supplement 1A). To increase the angular distribution of the particles in the final  
685 dataset, three datasets (5  $\mu$ M protein, 1  $\mu$ M protein, and 5  $\mu$ M protein + 0.05% w/v  $\beta$ -OG) were  
686 collected using the same exposure rate, total exposure, frame rate, and magnification, then  
687 merged and processed as a single dataset. A total of 1092 movies were collected and 944  
688 remained after removing micrographs with crystalline ice or CTF fits worse than 3.5 Å as judged  
689 by the 0.5 criterion in Appion. 890,658 particles were extracted, subjected to multiple rounds of  
690 2D classification and re-extraction in Relion-3, yielding a dataset of 490,560 ‘clean’ particles.  
691 These particles were used to generate an *ab initio* 3D model in cryoSPARC, which was used as a  
692 search model for 3D classification and 3D auto-refinement in Relion-3. After masking and  
693 postprocessing, this yielded a 3.7 Å resolution map. After local CTF refinement and beam-tilt  
694 estimation in Relion-3, the resolution improved to 2.9 Å resolution. While the AP2 core was well  
695 resolved, the density for NECAP was lower resolution (~4.5 Å local resolution), preventing us  
696 from building an accurate model. Signal subtraction (Bai et al., 2015) and 3D classification  
697 without alignment were used to find a sub-population that refined to 3.2 Å resolution, but with  
698 significantly improved density for NECAP. Local resolution estimation was performed using  
699 Relion-3, showing a range from 3.1 to 4.2 Å resolution, with the bulk of the model below 3.5 Å.  
700 This final map was used for model building, see *Model building and validation*, below.

#### 701 *phosphoAP2-NECAP (mu E302K) + DNA cryo-EM structure determination*

702 The phosphorylated AP2 core containing a hyper-active mu E302K mutation was purified in  
703 complex with full-length mouse NECAP2 using recombinant expression in *E. coli* (see  
704 *phosphoAP2-NECAP purification* above). The final protein buffer was 20 mM HEPES-KCl, pH  
705 8.0, 150 mM KCl, 1 mM DTT, 0.05% w/v  $\beta$ -OG. phosphoAP2-NECAP (mu E302K) at 3  $\mu$ M

706 concentration was mixed with 15  $\mu\text{M}$  of a 60 bp single-stranded DNA oligo (oEP971) and used  
707 to make cryo-EM grids. A total of 1497 movies were collected and 1126 remained after  
708 removing micrographs with crystalline ice or CTF fits worse than 3.5  $\text{\AA}$ . 717,231 particles were  
709 extracted, subjected to multiple rounds of 2D classification and re-extraction in Relion-3,  
710 yielding a dataset of 388,962 ‘clean’ particles. These particles were used to generate an *ab initio*  
711 3D model in cryoSPARC. 324,922 particles were found to go into high-resolution classes using  
712 heterogeneous refinement, and a final refinement was performed using the non-uniform  
713 refinement protocol in cryoSPARC v2, yielding a final resolution of 3.5  $\text{\AA}$ . Map sharpening and  
714 local resolution estimation was performed using cryoSPARC v2.

#### 715 *Model building and validation*

716 For each AP2-NECAP complex, the same general process was followed. The crystal structure of  
717 the AP2 complex in the closed conformation (PDB 2VGL) (Collins et al., 2002) and the solution  
718 structure of mouse NECAP1 (PDB 1TQZ) (Ritter et al., 2007) were docked into the cryo-EM  
719 map using Chimera (Pettersen et al., 2004). First, NECAP was manually rebuilt in Coot to match  
720 the cryo-EM density. A round of real space refinement was performed in Phenix using  
721 `phenix.real_space_refine` (Afonine et al., 2018). Regions of AP2 absent from the PDB 2VGL  
722 model were manually built in Coot (Emsley and Cowtan, 2004), including a region of the  $\mu$   
723 subunit containing phosphorylated T156. The NECAP model was then improved using  
724 RosettaCM and Rosetta *FastRelax* integrated into a cloud-based cryo-EM pipeline (Cianfrocco et  
725 al., 2018; Wang et al., 2015, 2016). At this point, a full phosphoAP2-NECAP model was  
726 generated and used as a starting model to generate  $\sim 1000$  models using RosettaCM. The model  
727 with the lowest energy score was then used to generate 100 models in Rosetta *FastRelax*. The  
728 lowest energy model from this analysis was further refined using `phenix.real_space_refine`. For

729 the ‘unclamped’ phosphoAP2-NECAP model, the following side chains were truncated to the C $\beta$   
730 atom (alpha residue 11; beta residue 5; mu residue 253, 261, 379, 380; NECAP residues 62,  
731 102). For the ‘clamped’ phosphoAP2-NECAP model, the following side chains were truncated to  
732 the C $\beta$  atom (alpha residue 11, 123, 217, 341, 381; beta residue 5, 26, 27, 232; mu residue 21,  
733 26, 261, 281, 379, 380; NECAP residues 94, 101, 102, 137). Additionally, a short poly-alanine  
734 peptide was modeled into the NECAP<sub>Ex</sub> density and included during model refinement for the  
735 ‘clamped’ structure.

### 736 *2D classification of ‘open’ vs ‘closed’ AP2 complexes*

737 AP2 and AP2 (mu E302K) were purified using recombinant expression in *E. coli* (see *AP2*  
738 *complex purification* above). Cryo-EM grids were prepared with 3  $\mu$ M protein with or without a  
739 5x molar excess of a 60 bp single-stranded DNA oligo (oEP971, same as that used in protease  
740 assay). Gel shift assays showed that phosphoAP2 (mu E302K)-NECAP has a K<sub>d</sub> of ~60 nM for  
741 the DNA oligo used for cryo-EM (Figure S4D). Assuming a single binding site, AP2 is expected  
742 to be >98% bound at the concentrations used for our cryo-EM analysis. Four datasets in total  
743 were collected: AP2, AP2 + DNA, AP2 (mu E302K), AP2 (mu E302K) + DNA. Particles were  
744 extracted and analyzed in Relion-3. For each sample, we first performed several rounds of 2D  
745 classification, yielding about ~50% of particles that entered classes with well-resolved secondary  
746 structure.

747

748

749

## 750 **QUANTIFICATION AND STATISTICAL ANALYSIS**

### 751 **Fitness Assays**

752 Measurements of number of days to starve were taken from 10 biological replicates for each  
753 strain. Significance was calculated using an unpaired, two tailed T-test with Prism GraphPad  
754 software. Data was normalized relative to NECAP (-) and NECAP (+) strains for visualization  
755 only.

### 756 **Pulldown Depletion Assays**

757 Three technical replicates were performed for each sample. Alpha:GST band intensity was  
758 quantified ( $AP2^{MEASURED}$ ) and these values were plotted against NECAP concentrations on a  
759 logarithmic scale. A sigmoidal (4PL) fit was applied to the data using GraphPad Prism 7.04. The  
760 asymptote representing the maximum AP2 that would remain in solution at zero NECAP  
761 concentration was calculated ( $AP2^{MAX}$ ). The ‘fraction AP2 bound’ in each sample was then  
762 calculated using the formula  $(1 - [AP2^{MEASURED}/AP2^{MAX}])$ . These normalized values were then  
763 plotted against NECAP concentrations on a logarithmic scale and an EC50 ( $K_d$ ) was calculated  
764 from a sigmoidal (4PL) fit of the data using GraphPad Prism 7.04. Note that for Figure 6B,  
765 ‘fraction AP2 bound’ was plotted against the concentration of NECAP on a linear scale.

### 766 ***In vivo* Imaging Assays**

767 Strains for each experiment were imaged in one session with the same laser settings. For each  
768 worm, a single confocal slice through the approximate sagittal section of the nerve ring was  
769 analyzed in Fiji. The GFP-AP2 signal corresponding to the nerve ring was used to define a  
770 region of interest (ROI) for quantification of ‘nerve ring RFP’. A second ROI in the anterior of

771 the worm that was outside the nerve ring and pharynx was used for normalization. ‘Nerve ring  
772 RFP’ was quantified as the average fluorescent intensity in the nerve ring ROI divided by the  
773 average fluorescent intensity in the ROI for normalization. Images were analyzed for ten  
774 biological replicates, and significance was calculated using an unpaired, two tailed T-test with  
775 Prism GraphPad software.

## 776 **2D classification of ‘open’ versus ‘closed’ AP2 complexes**

777 After identifying particles that fit into well-defined 2D classes, each particle set was randomly  
778 split into 10 subsets (technical replicates) and 2D classified in Relion-3. For each random subset,  
779 classes were divided into ‘open’ or ‘closed’ conformations based on projection matching with  
780 the ‘open’ (PDB 2XA7) (Jackson et al., 2010) and ‘closed’ (PDB 2VGL) (Collins et al., 2002)  
781 crystal structures. Projection matching was performed in SPIDER (Frank et al., 1996) with in-  
782 house scripts. The ten measurements of ‘open’ vs. ‘closed’ were used to calculate a standard  
783 error of the mean (SEM).

784

## 785 **DATA AND CODE AVAILABILITY**

786 The density maps generated during this study are available at the Electron Microscopy Data  
787 Bank (EMD-20215, unclamped and EMD-20220, clamped); the atomic structures generated  
788 during this study are available at the Protein Data Bank (PDB 6OWO, unclamped and 6OXL,  
789 clamped).

790

791 **References**

- 792 Afonine, P.V., Poon, B.K., Read, R.J., Sobolev, O.V., Terwilliger, T.C., Urzhumtsev, A., and  
793 Adams, P.D. (2018). Real-space refinement in PHENIX for cryo-EM and crystallography. *Acta*  
794 *Crystallogr D Struct Biol* 74, 531–544.
- 795 Aguet, F., Antonescu, C.N., Mettlen, M., Schmid, S.L., and Danuser, G. (2013). Advances in  
796 analysis of low signal-to-noise images link dynamin and AP2 to the functions of an endocytic  
797 checkpoint. *Dev. Cell* 26, 279–291.
- 798 Aguilar, R.C., Ohno, H., Roche, K.W., and Bonifacino, J.S. (1997). Functional Domain Mapping  
799 of the Clathrin-associated Adaptor Medium Chains  $\mu$ 1 and  $\mu$ 2. *J. Biol. Chem.* 272, 27160–27166.
- 800 Ashkenazy, H., Erez, E., Martz, E., Pupko, T., and Ben-Tal, N. (2010). ConSurf 2010:  
801 calculating evolutionary conservation in sequence and structure of proteins and nucleic acids.  
802 *Nucleic Acids Res.* 38, W529–W533.
- 803 Bai, X.-C., Rajendra, E., Yang, G., Shi, Y., and Scheres, S.H.W. (2015). Sampling the  
804 conformational space of the catalytic subunit of human  $\gamma$ -secretase. *Elife* 4.
- 805 Beacham, G.M., Partlow, E.A., Lange, J.J., and Hollopeter, G. (2018). NECAPs are negative  
806 regulators of the AP2 clathrin adaptor complex. *Elife* 7.
- 807 Brenner, S. (1974). The genetics of *Caenorhabditis elegans*. *Genetics* 77, 71–94.
- 808 Celniker, G., Nimrod, G., Ashkenazy, H., Glaser, F., Martz, E., Mayrose, I., Pupko, T., and Ben-  
809 Tal, N. (2013). ConSurf: Using Evolutionary Data to Raise Testable Hypotheses about Protein  
810 Function. *Isr. J. Chem.* 53, 199–206.

811 Chamberland, J.P., Antonow, L.T., Dias Santos, M., and Ritter, B. (2016). NECAP2 controls  
812 clathrin coat recruitment to early endosomes for fast endocytic recycling. *J. Cell Sci.* *129*, 2625–  
813 2637.

814 Cianfrocco, M.A., Lahiri, I., DiMaio, F., and Leschziner, A.E. (2018). cryoem-cloud-tools: A  
815 software platform to deploy and manage cryo-EM jobs in the cloud. *J. Struct. Biol.* *203*, 230–  
816 235.

817 Cocucci, E., Aguet, F., Boulant, S., and Kirchhausen, T. (2012). The first five seconds in the life  
818 of a clathrin-coated pit. *Cell* *150*, 495–507.

819 Collins, B.M., McCoy, A.J., Kent, H.M., Evans, P.R., and Owen, D.J. (2002). Molecular  
820 architecture and functional model of the endocytic AP2 complex. *Cell* *109*, 523–535.

821 Conner, S.D., and Schmid, S.L. (2002). Identification of an adaptor-associated kinase, AAK1, as  
822 a regulator of clathrin-mediated endocytosis. *J. Cell Biol.* *156*, 921–929.

823 Conner, S.D., Schröter, T., and Schmid, S.L. (2003). AAK1-Mediated  $\mu$ 2 Phosphorylation is  
824 Stimulated by Assembled Clathrin. *Traffic* *4*, 885–890.

825 Cremona, O., Di Paolo, G., Wenk, M.R., Lüthi, A., Kim, W.T., Takei, K., Daniell, L., Nemoto,  
826 Y., Shears, S.B., Flavell, R.A., et al. (1999). Essential role of phosphoinositide metabolism in  
827 synaptic vesicle recycling. *Cell* *99*, 179–188.

828 Ehrlich, M., Boll, W., Van Oijen, A., Hariharan, R., Chandran, K., Nibert, M.L., and  
829 Kirchhausen, T. (2004). Endocytosis by random initiation and stabilization of clathrin-coated  
830 pits. *Cell* *118*, 591–605.

- 831 Emsley, P., and Cowtan, K. (2004). Coot: model-building tools for molecular graphics. *Acta*  
832 *Crystallogr. D Biol. Crystallogr.* *60*, 2126–2132.
- 833 Fingerhut, A., von Figura, K., and Honing, S. (2001). Binding of AP2 to sorting signals is  
834 modulated by AP2 phosphorylation. *J. Biol. Chem.* *276*, 5476–5482.
- 835 Frank, J., Radermacher, M., Penczek, P., Zhu, J., Li, Y., Ladjadj, M., and Leith, A. (1996).  
836 SPIDER and WEB: processing and visualization of images in 3D electron microscopy and  
837 related fields. *J. Struct. Biol.* *116*, 190–199.
- 838 Frøkjær-Jensen, C., Davis, M.W., Ailion, M., and Jorgensen, E.M. (2012). Improved Mos1-  
839 mediated transgenesis in *C. elegans*. *Nat. Methods* *9*, 117–118.
- 840 Ghosh, P., and Kornfeld, S. (2003). AP-1 binding to sorting signals and release from clathrin-  
841 coated vesicles is regulated by phosphorylation. *J. Cell Biol.* *160*, 699–708.
- 842 Hannan, L.A., Newmyer, S.L., and Schmid, S.L. (1998). ATP- and cytosol-dependent release of  
843 adaptor proteins from clathrin-coated vesicles: A dual role for Hsc70. *Mol. Biol. Cell* *9*, 2217–  
844 2229.
- 845 He, K., Marsland, R., III, Upadhyayula, S., Song, E., Dang, S., Capraro, B.R., Wang, W.,  
846 Skillern, W., Gaudin, R., Ma, M., et al. (2017). Dynamics of phosphoinositide conversion in  
847 clathrin-mediated endocytic traffic. *Nature* *552*, 410–414.
- 848 Heldwein, E.E., Macia, E., Wang, J., Yin, H.L., Kirchhausen, T., and Harrison, S.C. (2004).  
849 Crystal structure of the clathrin adaptor protein 1 core. *Proc. Natl. Acad. Sci. U. S. A.* *101*,  
850 14108–14113.



851 Henne, W.M., Boucrot, E., Meinecke, M., Evergren, E., Vallis, Y., Mittal, R., and McMahon,  
852 H.T. (2010). FCHo proteins are nucleators of clathrin-mediated endocytosis. *Science* 328, 1281–  
853 1284.

854 Herzik, M.A., Jr, Wu, M., and Lander, G.C. (2017). Achieving better-than-3-Å resolution by  
855 single-particle cryo-EM at 200 keV. *Nat. Methods* 14, 1075–1078.

856 Hollopeter, G., Lange, J.J., Zhang, Y., Vu, T.N., Gu, M., Ailion, M., Lambie, E.J., Slaughter,  
857 B.D., Unruh, J.R., Florens, L., et al. (2014). The membrane-associated proteins FCHo and SGIP  
858 are allosteric activators of the AP2 clathrin adaptor complex. *Elife* 3.

859 Höning, S., Ricotta, D., Krauss, M., Späte, K., Spolaore, B., Motley, A., Robinson, M.,  
860 Robinson, C., Haucke, V., and Owen, D.J. (2005). Phosphatidylinositol- (4,5)-bisphosphate  
861 regulates sorting signal recognition by the clathrin-associated adaptor complex AP2. *Mol. Cell*  
862 18, 519–531.

863 Jackson, A.P., Flett, A., Smythe, C., Hufton, L., Wetthey, F.R., and Smythe, E. (2003). Clathrin  
864 promotes incorporation of cargo into coated pits by activation of the AP2 adaptor micro2 kinase.  
865 *J. Cell Biol.* 163, 231–236.

866 Jackson, L.P., Kelly, B.T., McCoy, A.J., Gaffry, T., James, L.C., Collins, B.M., Höning, S.,  
867 Evans, P.R., and Owen, D.J. (2010). A large-scale conformational change couples membrane  
868 recruitment to cargo binding in the AP2 clathrin adaptor complex. *Cell* 141, 1220–1229.

869 Jia, X., Weber, E., Tokarev, A., Lewinski, M., Rizk, M., Suarez, M., Guatelli, J., and Xiong, Y.  
870 (2014). Structural basis of HIV-1 Vpu-mediated BST2 antagonism via hijacking of the clathrin  
871 adaptor protein complex 1. *Elife* 3, e02362.

872 Kadlecova, Z., Spielman, S.J., Loerke, D., Mohanakrishnan, A., Reed, D.K., and Schmid, S.L.  
873 (2017). Regulation of clathrin-mediated endocytosis by hierarchical allosteric activation of AP2.  
874 *J. Cell Biol.* *216*, 167–179.

875 Kelly, B.T., McCoy, A.J., Späte, K., Miller, S.E., Evans, P.R., Höning, S., and Owen, D.J.  
876 (2008). A structural explanation for the binding of endocytic dileucine motifs by the AP2  
877 complex. *Nature* *456*, 976–979.

878 Kelly, B.T., Graham, S.C., Liska, N., Dannhauser, P.N., Höning, S., Ungewickell, E.J., and  
879 Owen, D.J. (2014). Clathrin adaptors. AP2 controls clathrin polymerization with a membrane-  
880 activated switch. *Science* *345*, 459–463.

881 Kirchhausen, T., Owen, D., and Harrison, S.C. (2014). Molecular structure, function, and  
882 dynamics of clathrin-mediated membrane traffic. *Cold Spring Harb. Perspect. Biol.* *6*, a016725.

883 Lander, G.C., Stagg, S.M., Voss, N.R., Cheng, A., Fellmann, D., Pulokas, J., Yoshioka, C.,  
884 Irving, C., Mulder, A., Lau, P.-W., et al. (2009). Appion: an integrated, database-driven pipeline  
885 to facilitate EM image processing. *J. Struct. Biol.* *166*, 95–102.

886 Loerke, D., Mettlen, M., Yarar, D., Jaqaman, K., Jaqaman, H., Danuser, G., and Schmid, S.L.  
887 (2009). Cargo and dynamin regulate clathrin-coated pit maturation. *PLoS Biol.* *7*, e57.

888 Matsui, W., and Kirchhausen, T. (1990). Stabilization of clathrin coats by the core of the  
889 clathrin-associated protein complex AP-2. *Biochemistry* *29*, 10791–10798.

890 Mettlen, M., Chen, P.-H., Srinivasan, S., Danuser, G., and Schmid, S.L. (2018). Regulation of  
891 Clathrin-Mediated Endocytosis. *Annu. Rev. Biochem.* *87*, 871–896.

- 892 Nakane, T., Kimanius, D., Lindahl, E., and Scheres, S.H. (2018). Characterisation of molecular  
893 motions in cryo-EM single-particle data by multi-body refinement in RELION. *Elife* 7.
- 894 Olusanya, O., Andrews, P.D., Swedlow, J.R., and Smythe, E. (2001). Phosphorylation of  
895 threonine 156 of the  $\mu 2$  subunit of the AP2 complex is essential for endocytosis in vitro and in  
896 vivo. *Curr. Biol.* 11, 896–900.
- 897 Owen, D.J., Collins, B.M., and Evans, P.R. (2004). Adaptors for clathrin coats: structure and  
898 function. *Annu. Rev. Cell Dev. Biol.* 20, 153–191.
- 899 Paix, A., Folkmann, A., Rasoloson, D., and Seydoux, G. (2015). High Efficiency, Homology-  
900 Directed Genome Editing in *Caenorhabditis elegans* Using CRISPR-Cas9 Ribonucleoprotein  
901 Complexes. *Genetics* 201, 47–54.
- 902 Pauloin, A., Bernier, I., and Jollès, P. (1982). Presence of cyclic nucleotide–Ca<sup>2+</sup> independent  
903 protein kinase in bovine brain coated vesicles. *Nature* 298, 574–576.
- 904 Pettersen, E.F., Goddard, T.D., Huang, C.C., Couch, G.S., Greenblatt, D.M., Meng, E.C., and  
905 Ferrin, T.E. (2004). UCSF Chimera—a visualization system for exploratory research and  
906 analysis. *J. Comput. Chem.* 25, 1605–1612.
- 907 Punjani, A., Rubinstein, J.L., Fleet, D.J., and Brubaker, M.A. (2017). cryoSPARC: algorithms  
908 for rapid unsupervised cryo-EM structure determination. *Nat. Methods* 14, 290–296.
- 909 Puthenveedu, M.A., and von Zastrow, M. (2006). Cargo regulates clathrin-coated pit dynamics.  
910 *Cell* 127, 113–124.
- 911 Ren, X., Farías, G.G., Canagarajah, B.J., Bonifacino, J.S., and Hurley, J.H. (2013). Structural

912 basis for recruitment and activation of the AP-1 clathrin adaptor complex by Arf1. *Cell* *152*,  
913 755–767.

914 Ricotta, D., Conner, S.D., Schmid, S.L., von Figura, K., and Höning, S. (2002). Phosphorylation  
915 of the AP2  $\mu$  subunit by AAK1 mediates high affinity binding to membrane protein sorting  
916 signals. *J. Cell Biol.* *156*, 791–795.

917 Ritter, B., Philie, J., Girard, M., Tung, E.C., Blondeau, F., and McPherson, P.S. (2003).  
918 Identification of a family of endocytic proteins that define a new  $\alpha$ -adaptin ear-binding motif.  
919 *EMBO Rep.* *4*, 1089–1093.

920 Ritter, B., Denisov, A.Y., Philie, J., Deprez, C., Tung, E.C., Gehring, K., and McPherson, P.S.  
921 (2004). Two WXXF-based motifs in NECAPs define the specificity of accessory protein binding  
922 to AP-1 and AP-2. *EMBO J.* *23*, 3701–3710.

923 Ritter, B., Denisov, A.Y., Philie, J., Allaire, P.D., Legendre-Guillemain, V., Zylbergold, P.,  
924 Gehring, K., and McPherson, P.S. (2007). The NECAP PHear domain increases clathrin  
925 accessory protein binding potential. *EMBO J.* *26*, 4066–4077.

926 Ritter, B., Murphy, S., Dokainish, H., Girard, M., Gudheti, M.V., Kozlov, G., Halin, M., Philie,  
927 J., Jorgensen, E.M., Gehring, K., et al. (2013). NECAP 1 regulates AP-2 interactions to control  
928 vesicle size, number, and cargo during clathrin-mediated endocytosis. *PLoS Biol.* *11*, e1001670.

929 Rohou, A., and Grigorieff, N. (2015). CTFFIND4: Fast and accurate defocus estimation from  
930 electron micrographs. *J. Struct. Biol.* *192*, 216–221.

931 Scheres, S.H.W. (2012). RELION: implementation of a Bayesian approach to cryo-EM structure

- 932 determination. *J. Struct. Biol.* *180*, 519–530.
- 933 Sochacki, K.A., Dickey, A.M., Strub, M.-P., and Taraska, J.W. (2017). Endocytic proteins are  
934 partitioned at the edge of the clathrin lattice in mammalian cells. *Nat. Cell Biol.* *19*, 352–361.
- 935 Suloway, C., Pulokas, J., Fellmann, D., Cheng, A., Guerra, F., Quispe, J., Stagg, S., Potter, C.S.,  
936 and Carragher, B. (2005). Automated molecular microscopy: the new Legimon system. *J. Struct.*  
937 *Biol.* *151*, 41–60.
- 938 Taylor, M.J., Perrais, D., and Merrifield, C.J. (2011). A high precision survey of the molecular  
939 dynamics of mammalian clathrin-mediated endocytosis. *PLoS Biol.* *9*, e1000604.
- 940 Umasankar, P.K., Ma, L., Thieman, J.R., Jha, A., Doray, B., Watkins, S.C., and Traub, L.M.  
941 (2014). A clathrin coat assembly role for the muniscin protein central linker revealed by  
942 TALEN-mediated gene editing. *Elife* *3*.
- 943 Umeda, A., Meyerholz, A., and Ungewickell, E. (2000). Identification of the universal cofactor  
944 (auxilin 2) in clathrin coat dissociation. *Eur. J. Cell Biol.* *79*, 336–342.
- 945 Voss, N.R., Yoshioka, C.K., Radermacher, M., Potter, C.S., and Carragher, B. (2009). DoG  
946 Picker and TiltPicker: software tools to facilitate particle selection in single particle electron  
947 microscopy. *J. Struct. Biol.* *166*, 205–213.
- 948 Wang, R.Y.-R., Kudryashev, M., Li, X., Egelman, E.H., Basler, M., Cheng, Y., Baker, D., and  
949 DiMaio, F. (2015). De novo protein structure determination from near-atomic-resolution cryo-  
950 EM maps. *Nat. Methods* *12*, 335–338.
- 951 Wang, R.Y.-R., Song, Y., Barad, B.A., Cheng, Y., Fraser, J.S., and DiMaio, F. (2016).

- 952 Automated structure refinement of macromolecular assemblies from cryo-EM maps using  
953 Rosetta. *Elife* 5.
- 954 Zheng, S.Q., Palovcak, E., Armache, J.-P., Verba, K.A., Cheng, Y., and Agard, D.A. (2017).  
955 MotionCor2: anisotropic correction of beam-induced motion for improved cryo-electron  
956 microscopy. *Nat. Methods* 14, 331–332.
- 957

**Table 1. Cryo-EM data collection, refinement, and validation statistics**

|                                              | <b>pAP2-NECAP "unclamped"</b>     |           | <b>pAP2-NECAP "clamped"</b>       |           |
|----------------------------------------------|-----------------------------------|-----------|-----------------------------------|-----------|
|                                              | PDB ID:                           | 6OWO      | PDB ID:                           | 6OXL      |
|                                              | EMDB ID:                          | EMD-20215 | EMDB ID:                          | EMD-20220 |
| <b>Data Collection</b>                       |                                   |           |                                   |           |
| Microscope                                   | Talos Arctica                     |           | Talos Arctica                     |           |
| Camera                                       | K2 summit                         |           | K2 summit                         |           |
| Camera Mode                                  | Super-Resolution                  |           | Counting                          |           |
| Magnification                                | 36,000                            |           | 36,000                            |           |
| Voltage (kV)                                 | 200                               |           | 200                               |           |
| Total electron exposure (e-/Å <sup>2</sup> ) | 60                                |           | 50                                |           |
| Exposure rate (e-/pixel/sec)                 | 6.67                              |           | 6.43                              |           |
| Defocus Range (um)                           | 0.6-2.5                           |           | 0.6-2.5                           |           |
| Pixel Size (Å/pixel)                         | 0.58                              |           | 1.16                              |           |
| Micrographs collected (no.)                  | 1092                              |           | 1497                              |           |
| Micrographs used (no.)                       | 944                               |           | 1126                              |           |
| <b>Reconstruction</b>                        |                                   |           |                                   |           |
| 3D Processing Package                        | Relion 3                          |           | cryoSPARC v2                      |           |
| Total Extracted picks (no.)                  | 890,658                           |           | 717,231                           |           |
| Refined particles (no.)                      | 490,560                           |           | 388,962                           |           |
| Final Particles (no.)                        | 71,571                            |           | 324,922                           |           |
| Symmetry                                     | C1                                |           | C1                                |           |
| Resolution (global) (Å)                      | 3.2                               |           | 3.5                               |           |
| FSC 0.143 (unmasked/masked)                  | 4.1/3.2                           |           | (4.2/3.5)                         |           |
| Local resolution range (Å)                   | 3.1-4.2                           |           | 3.2-6.1                           |           |
| Map sharpening <i>B</i> -factor              | -29                               |           | -160                              |           |
| <b>Refinement</b>                            |                                   |           |                                   |           |
| Model refinement package                     | Rosetta, phenix.real_space_refine |           | Rosetta, phenix.real_space_refine |           |
| Model composition                            |                                   |           |                                   |           |
| Nonhydrogen atoms                            | 14,280                            |           | 14,418                            |           |
| Protein residues                             | 1,785                             |           | 1,814                             |           |
| <i>B</i> factors (Å <sup>2</sup> )           |                                   |           |                                   |           |
| Protein residues                             | 62.53                             |           | 62.72                             |           |
| R.m.s. deviations                            |                                   |           |                                   |           |
| Bond Lengths (Å)                             | 0.009                             |           | 0.01                              |           |
| Bond angles (°)                              | 1.182                             |           | 1.253                             |           |
| <b>Validation</b>                            |                                   |           |                                   |           |
| MolProbity score                             | 1.4                               |           | 1.75                              |           |
| Clashscore                                   | 3.92                              |           | 6.62                              |           |
| Poor rotamers (%)                            | 0.25                              |           | 0.06                              |           |
| CaBLAM outliers (%)                          | 1.34                              |           | 1.38                              |           |
| Ramachandran plot                            |                                   |           |                                   |           |
| Favored (%)                                  | 96.57                             |           | 94.36                             |           |
| Allowed (%)                                  | 3.32                              |           | 5.64                              |           |
| Disallowed (%)                               | 0.11                              |           | 0                                 |           |
| EMRinger score                               | 3.33                              |           | 3.047                             |           |
| Map CC ( <i>CCmask</i> )                     | 0.857                             |           | 0.815                             |           |

## Figure 1. NECAP PHear domain binds phosphorylated AP2 core.

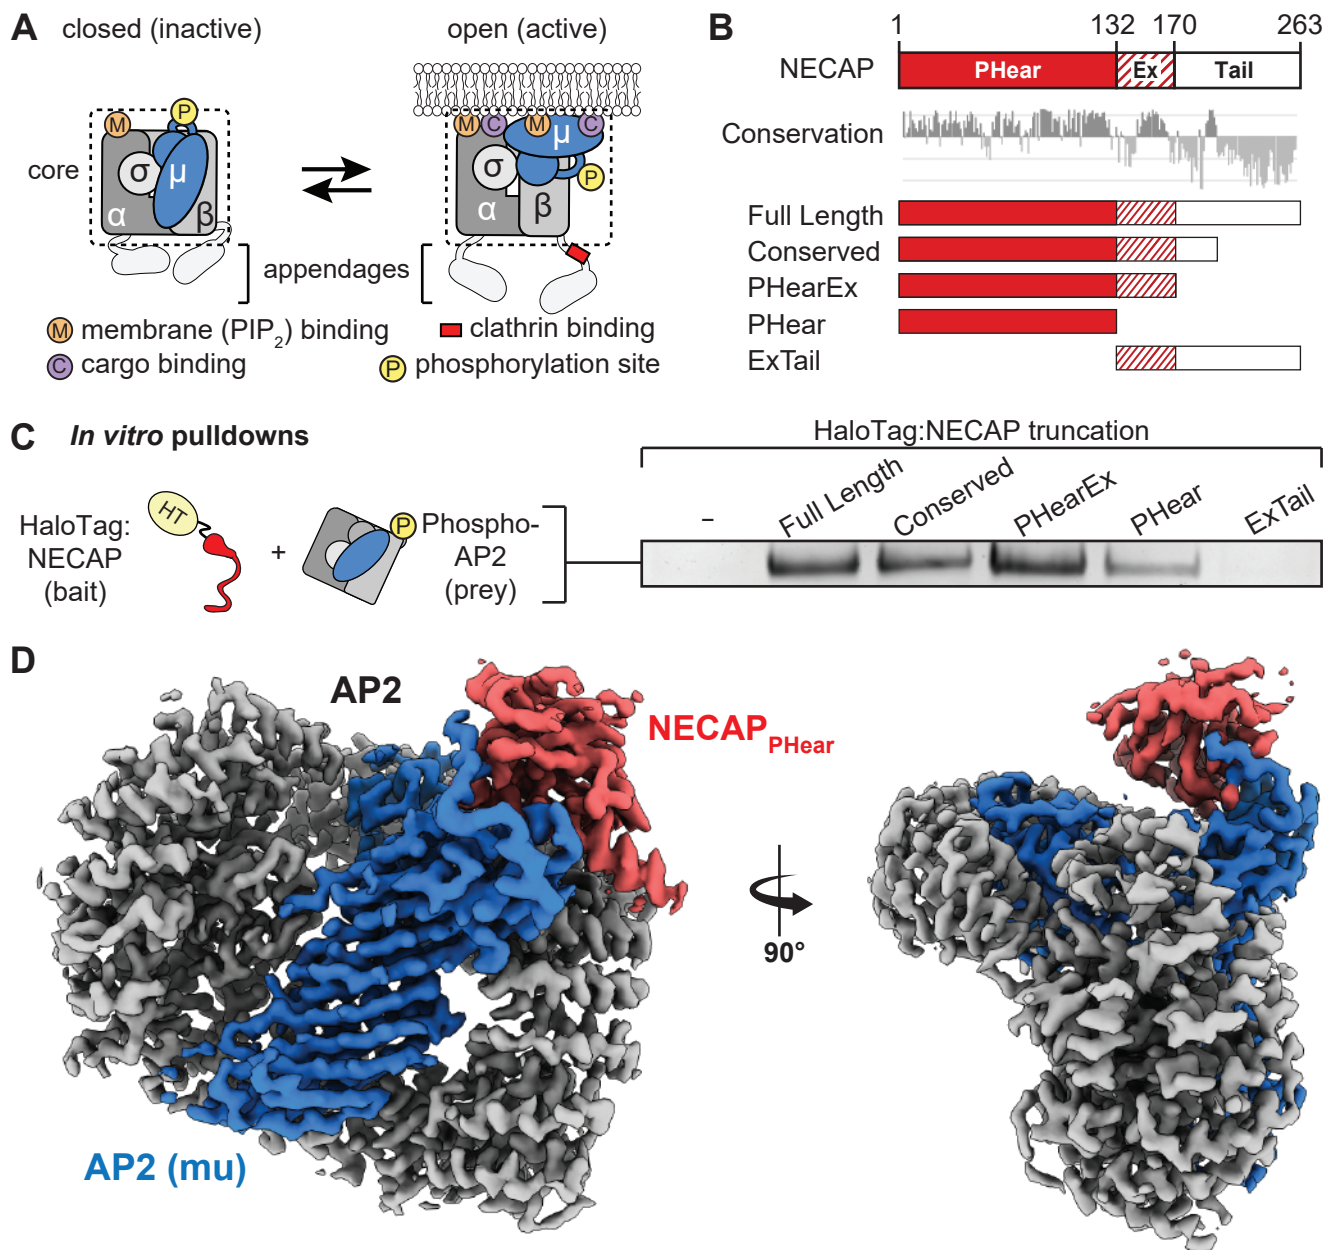



## Figure 2. Genetic screen for NECAP-AP2 interface mutations.

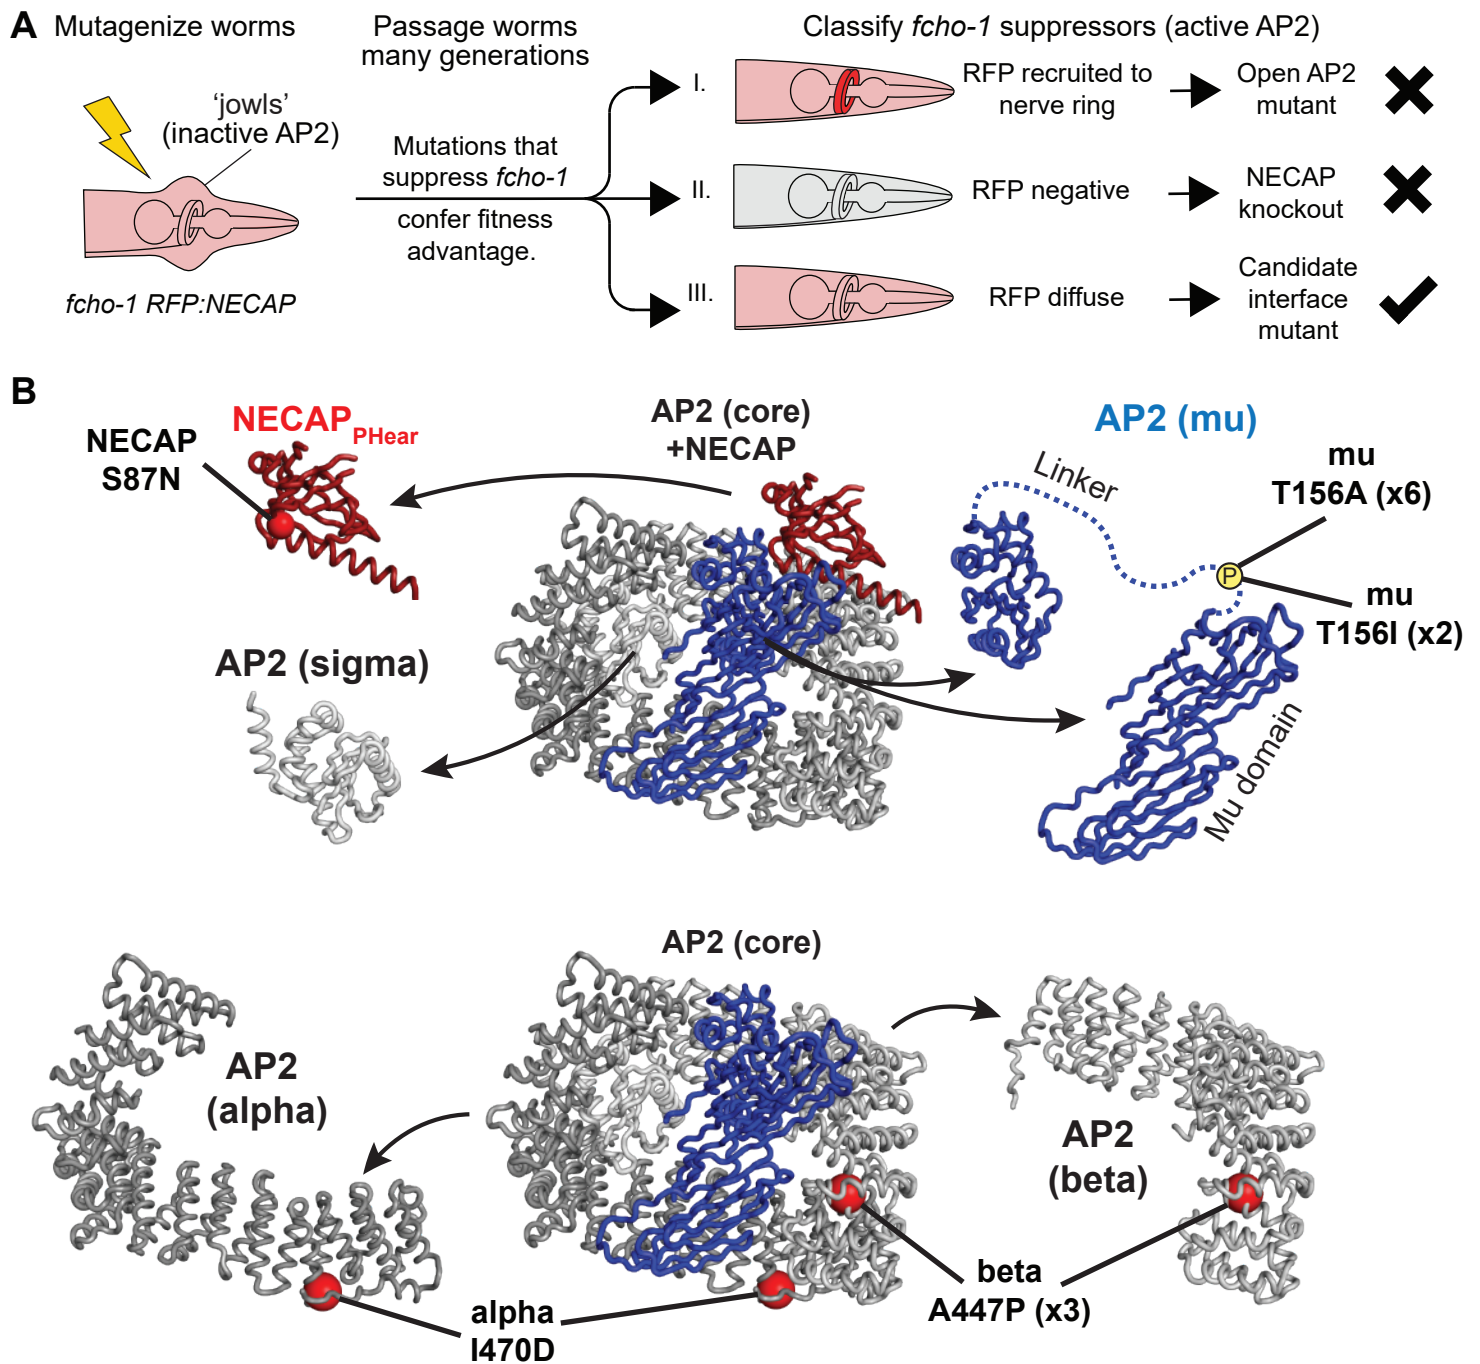

**C**

| Gene                    | Amino acid change | Mouse equivalent | Isolation method |            |           |
|-------------------------|-------------------|------------------|------------------|------------|-----------|
|                         |                   |                  | This screen      | Previously | Other     |
| mu ( <i>apm-2</i> )     | T160A             | T156A (P)        | 6x               | once       | —         |
| mu ( <i>apm-2</i> )     | T160I             | T156I (P)        | twice            | once       | —         |
| NECAP ( <i>ncap-1</i> ) | S84N              | S87N             | once             | once       | —         |
| NECAP ( <i>ncap-1</i> ) | R109E             | R112E            | —                | —          | predicted |
| NECAP ( <i>ncap-1</i> ) | A29D              | A32D             | —                | once       | —         |
| alpha ( <i>apa-2</i> )  | V469D             | I470D            | once             | —          | —         |
| beta ( <i>apb-1</i> )   | S444P             | S447P            | thrice           | —          | —         |
| NECAP ( <i>ncap-1</i> ) | KEG148-150AAA     | KDG153-155AAA    | —                | —          | predicted |
| mu ( <i>apm-2</i> )     | E306K             | E302K            | —                | —          | open AP2  |

### Figure 3. Coordination of phosphorylated AP2 by NECAP is required for inactivation.

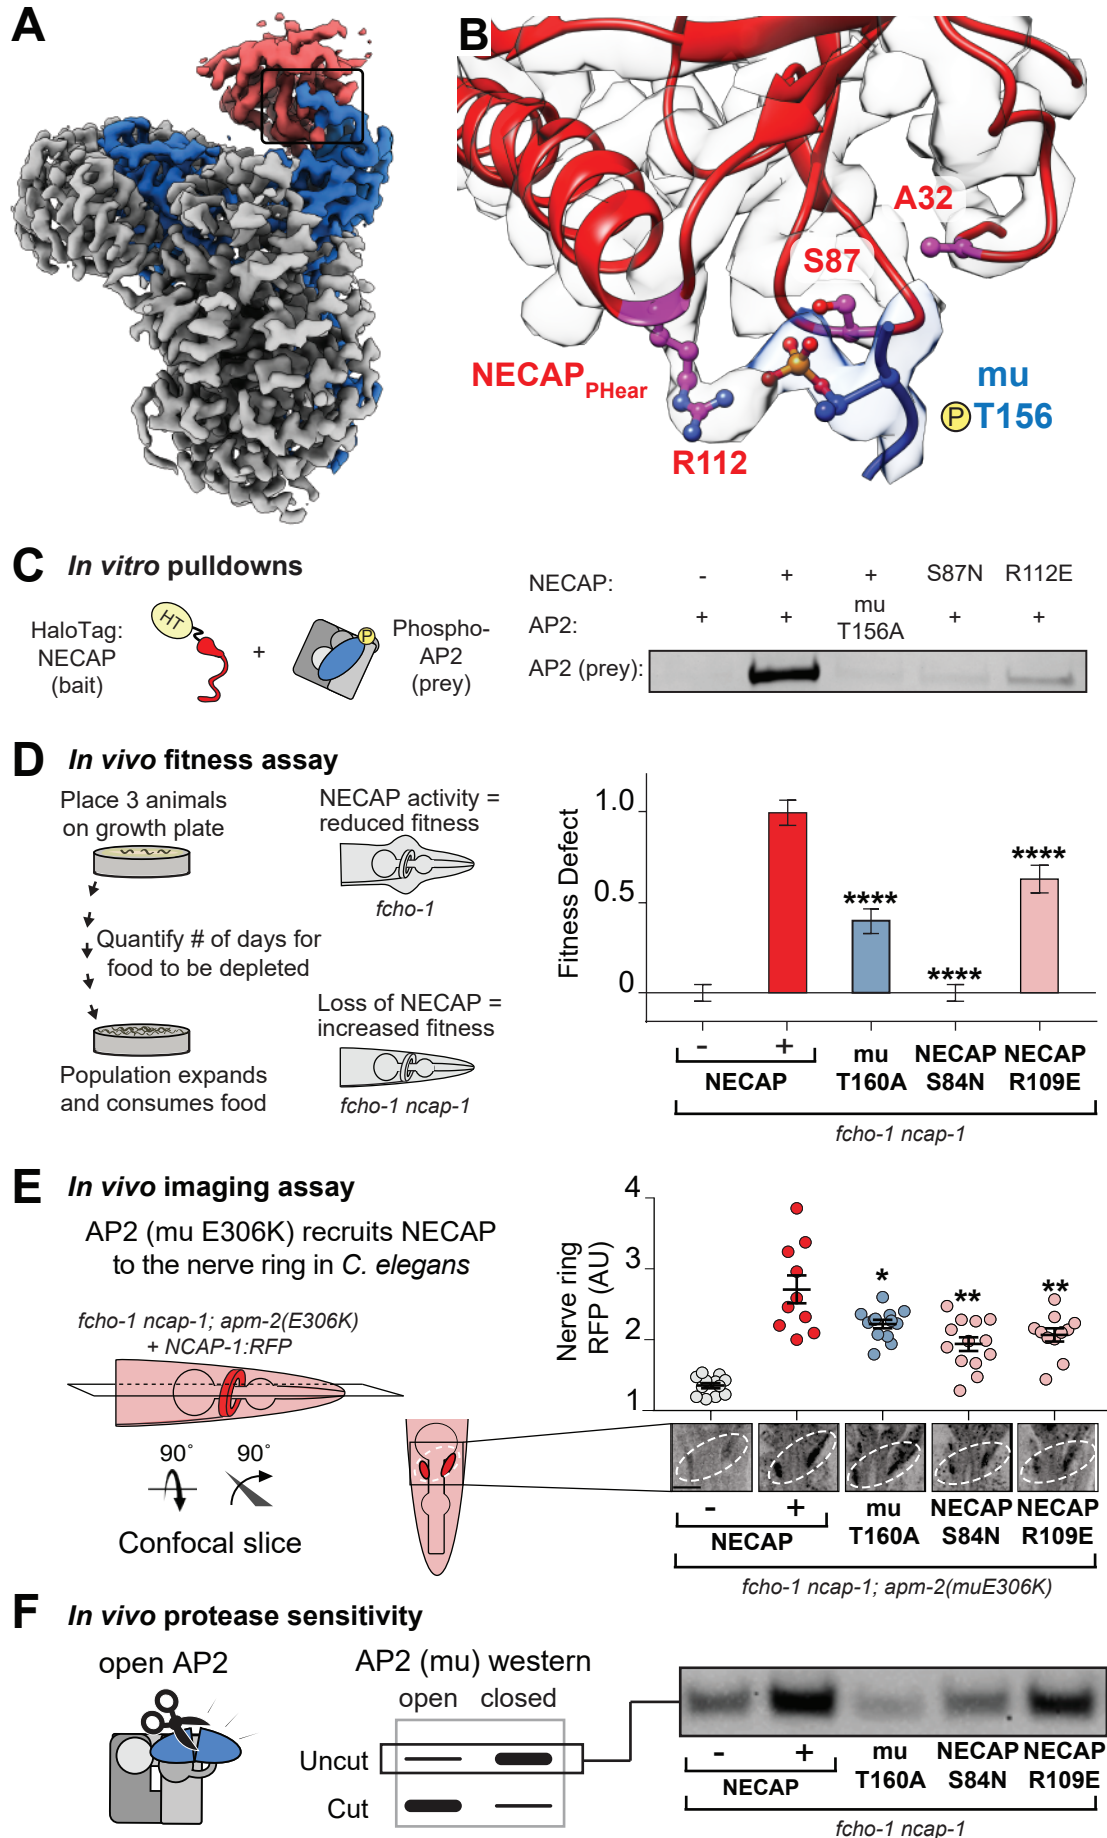

## Figure 4. Membrane-mimetics stimulate opening of AP2.

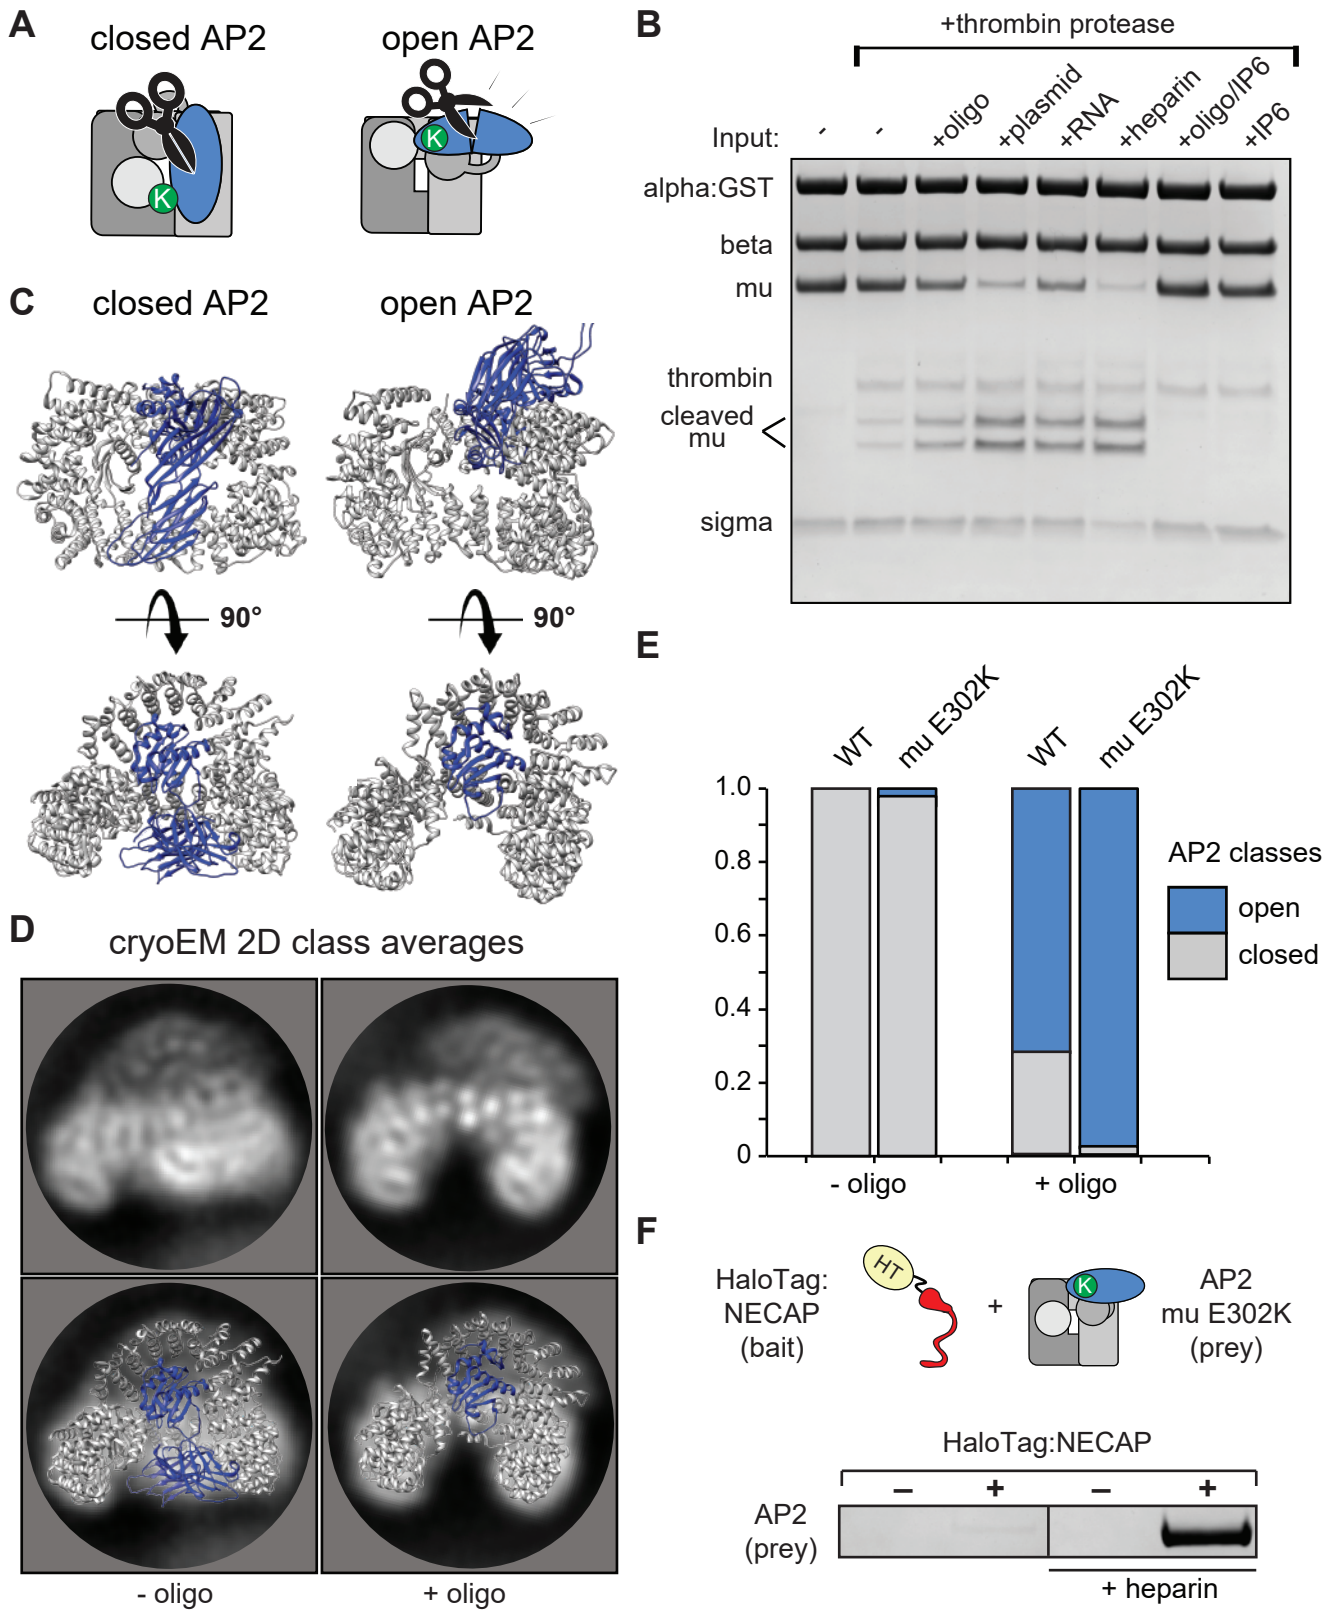

## Figure 5. NECAP<sub>Ex</sub> recognizes membrane-activated AP2.

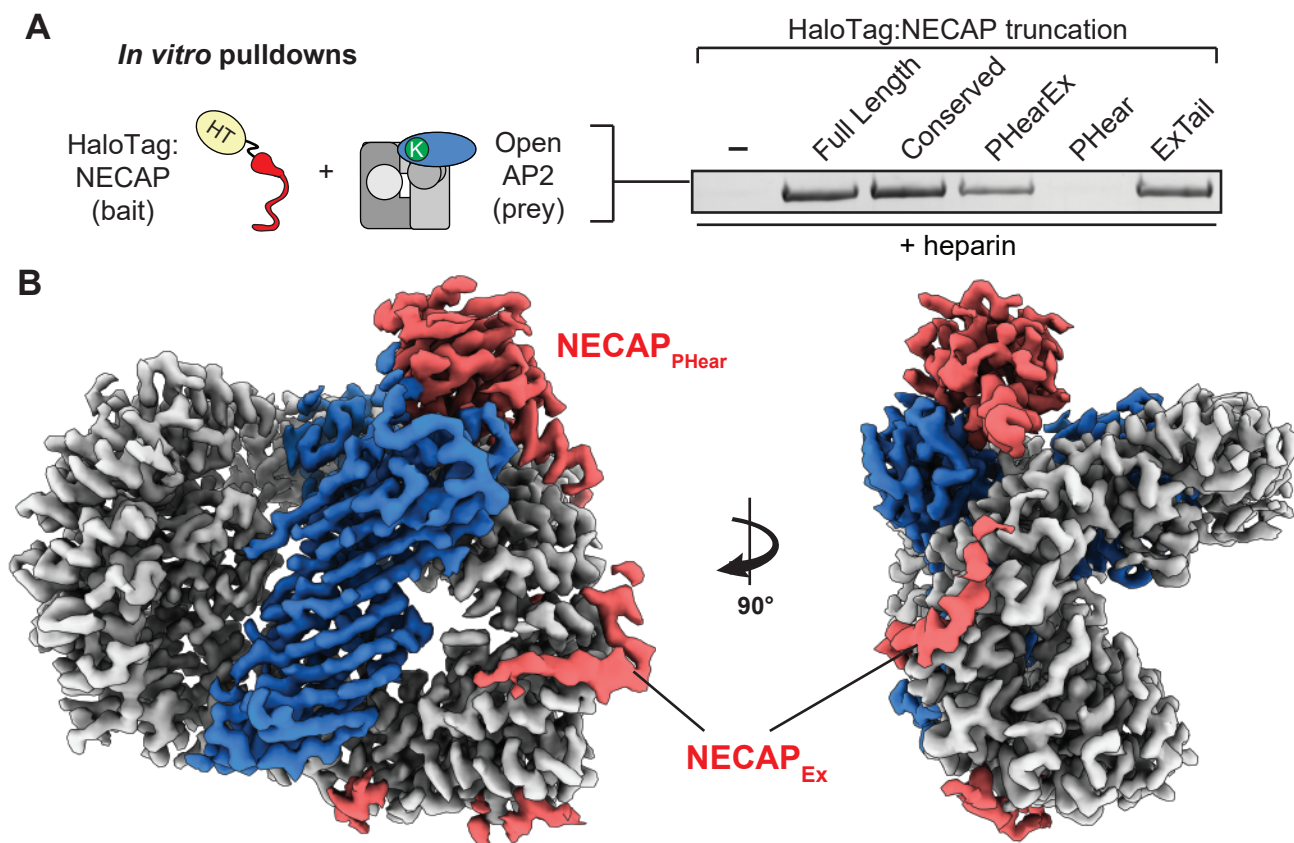

## Figure 6. The AP2-NECAP<sub>Ex</sub> interface is required for inactivation.

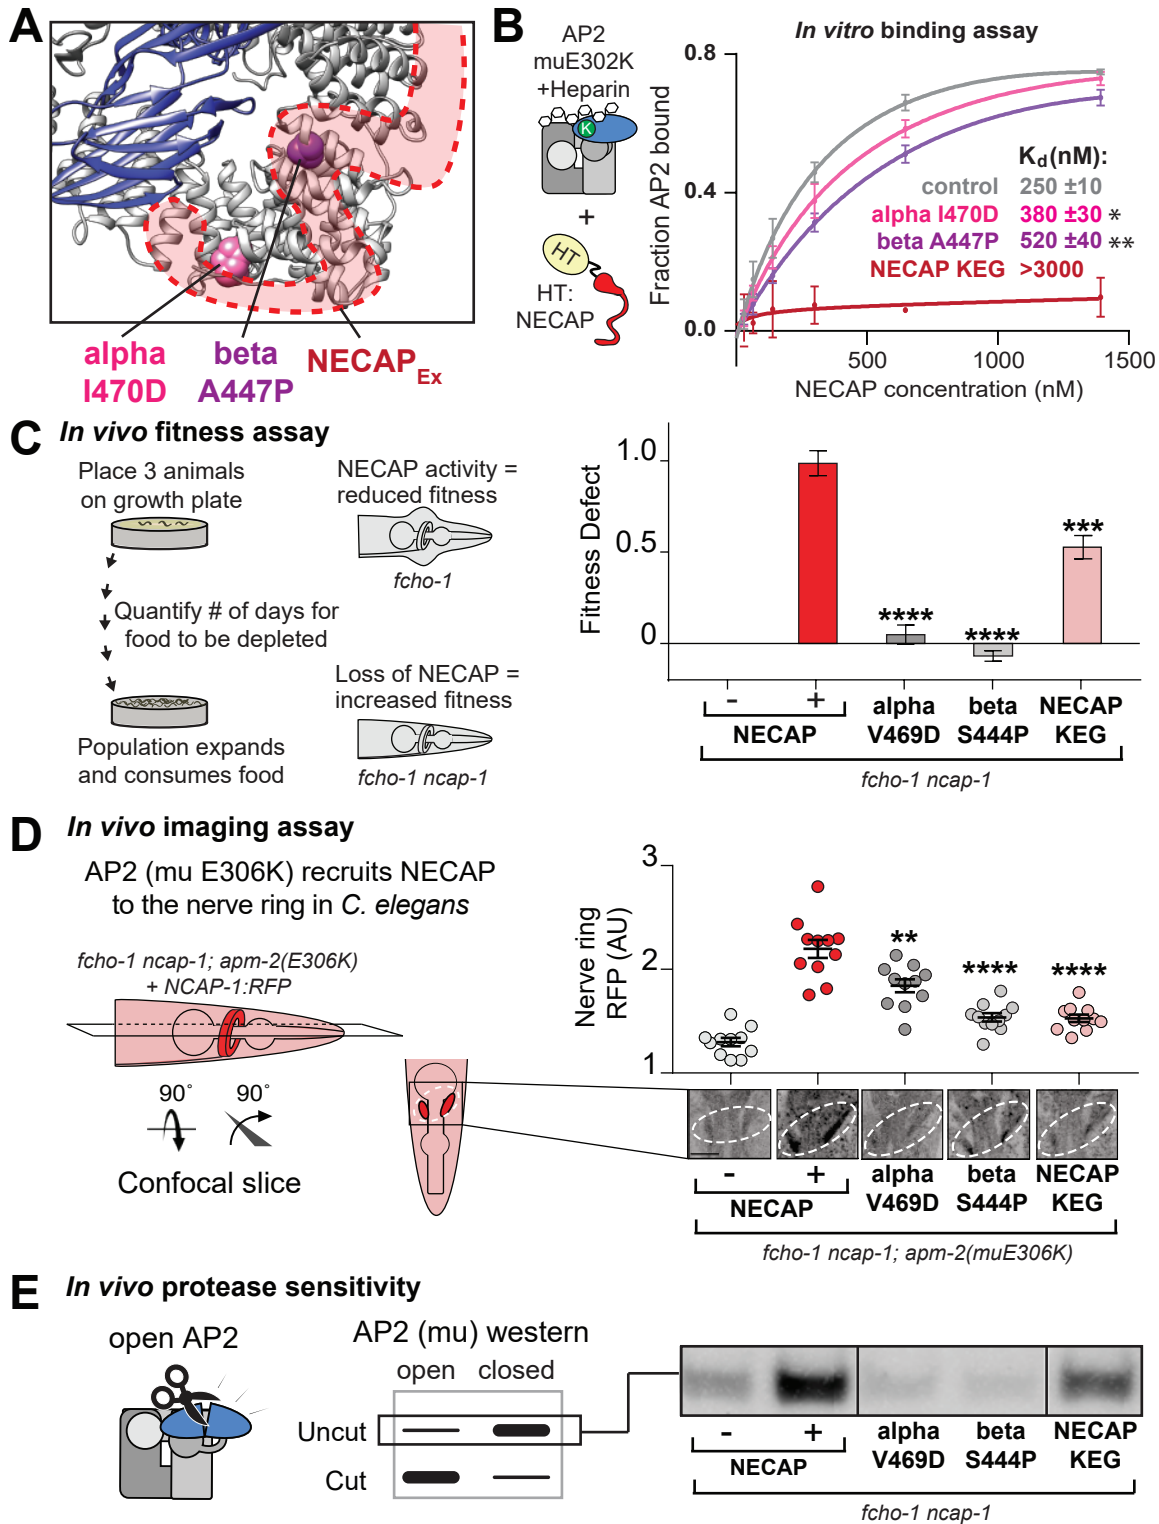

## Figure 7. NECAP clamps AP2 in a closed, inactive conformation.

### A Protease sensitivity assays

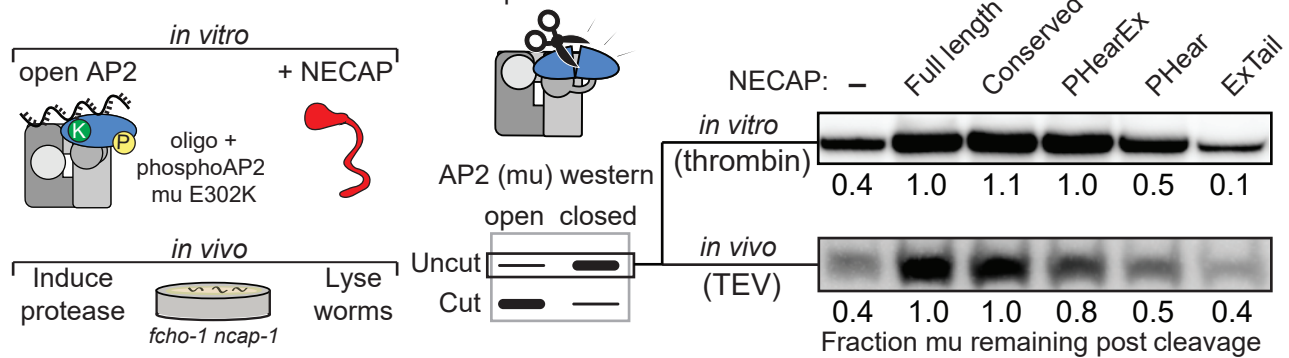

### B In vivo fitness assay

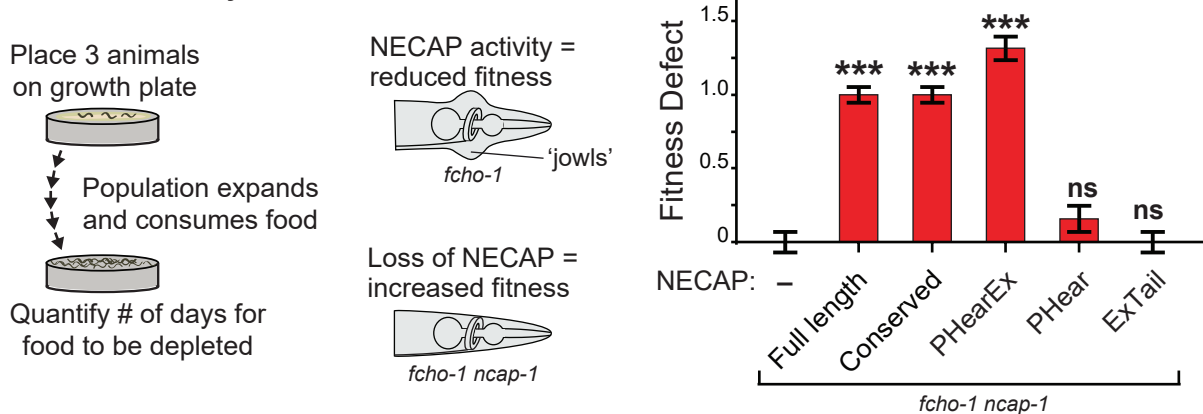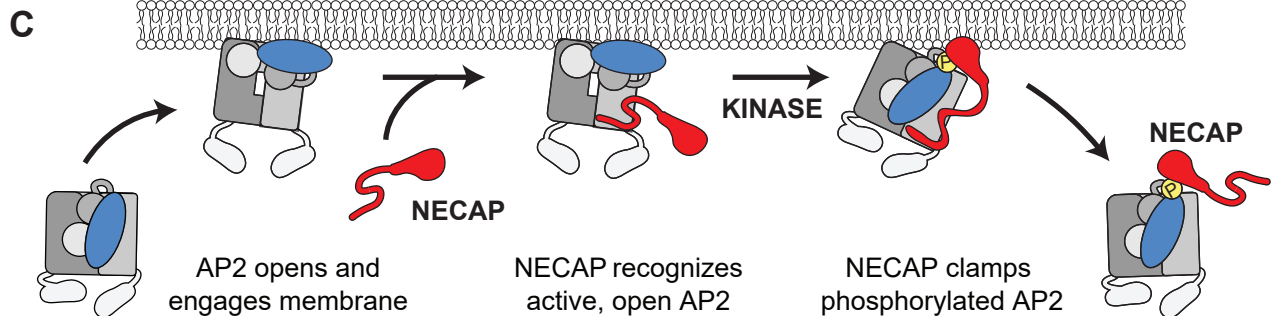

**A** 2D classification: 890,858 picks, 2.3 Å/pixel

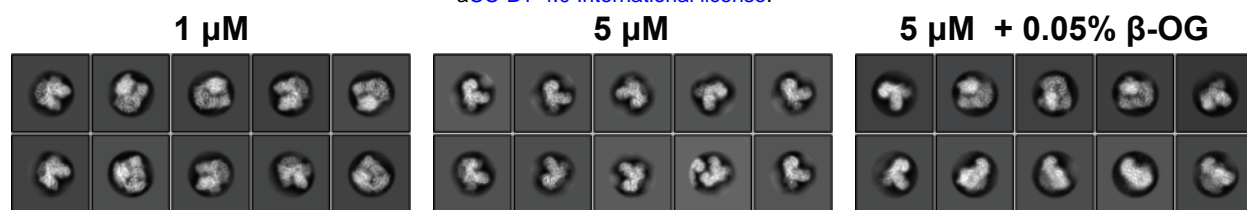

**B** 3D classification (1 class), re-center and re-extract  
3D auto-refine: 490,560 particles

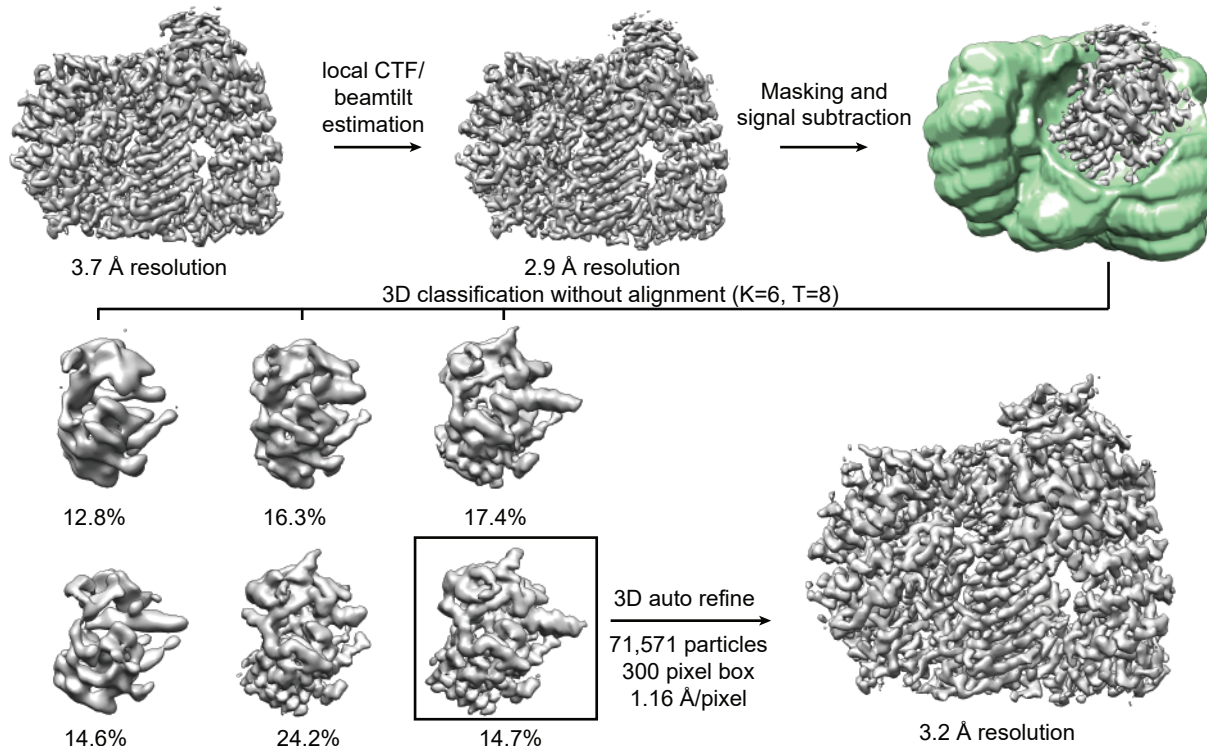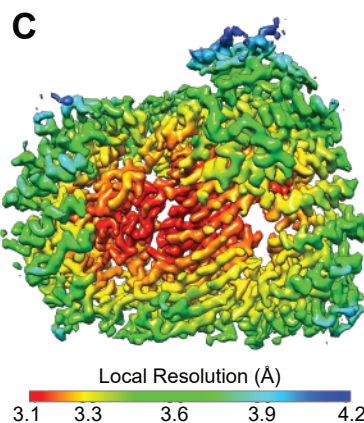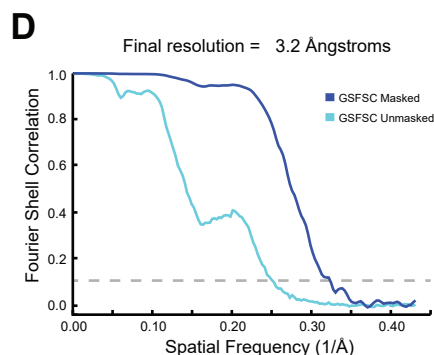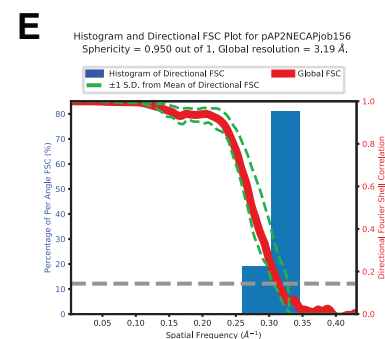

**Figure 1—figure supplement 1. Classification, signal subtraction, and refinement of phosphoAP2 bound to NECAP**

**A.** Representative 2D class averages demonstrating different particle orientation preferences under different grid preparation conditions.

**B.** Processing workflow for 3D classification and refinement of phosphoAP2-NECAP using the Relion 3 software suite.

**C.** Cryo-EM map colored by local resolution (Relion 3).

**D.** Fourier Shell Correlation (FSC) plot

**E.** 3D FSC plot. An overall sphericity of 0.95 shows that resolution is nearly uniform in three dimensions.

**F.** Histogram plot of Cα RMSD of top ten molecular models from Rosetta refinement. Inset shows molecular model colored and scaled by RMSD.

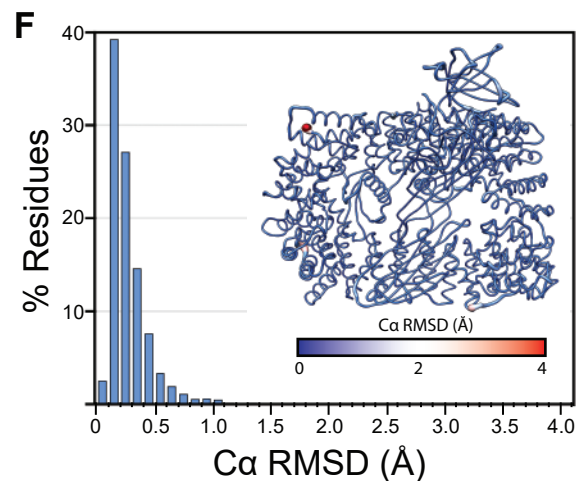

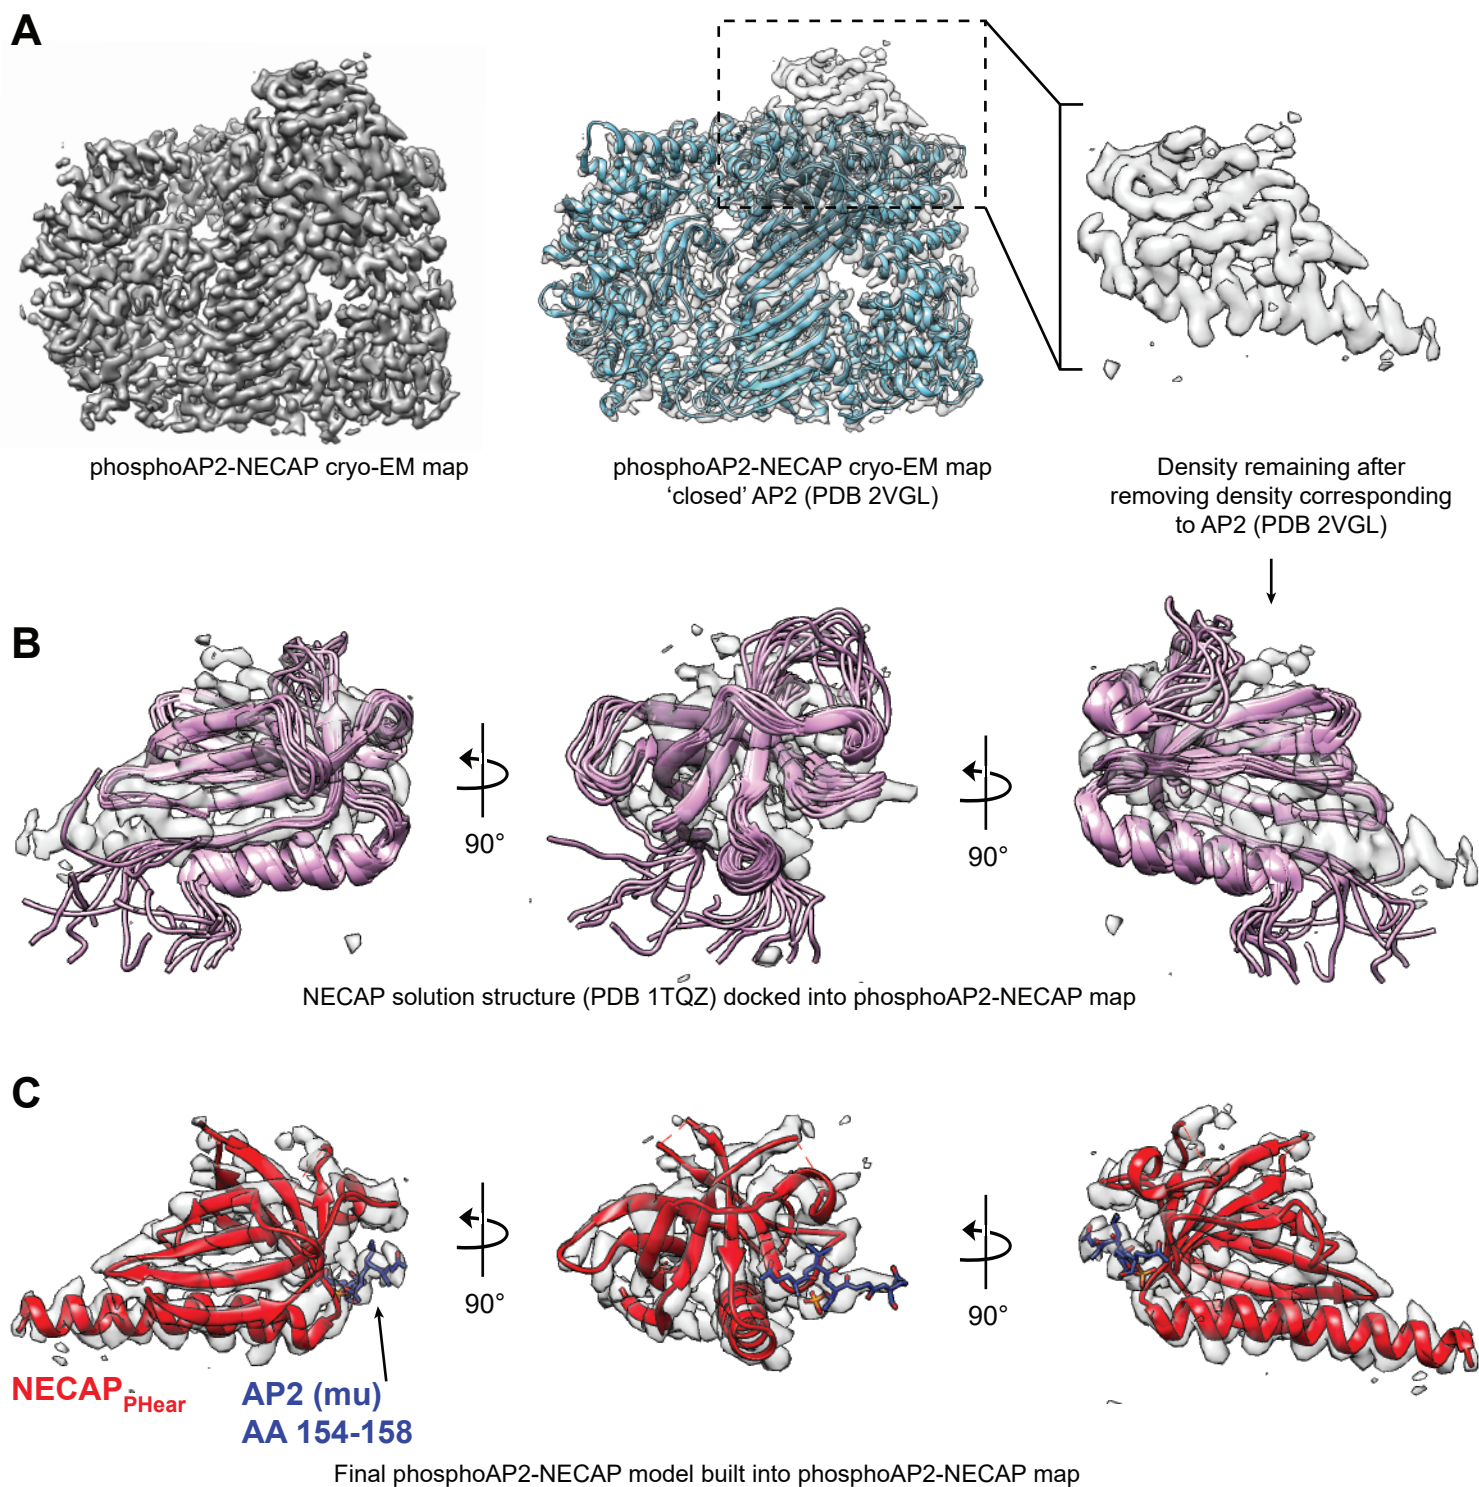

**Figure 1—figure supplement 2. Comparison of NECAP solution structure and phosphoAP2-NECAP cryo-EM structure**

**A.** Cryo-EM map of phosphoAP2-NECAP is shown with a solid surface (left) and with a transparent surface with the closed AP2 crystal structure docked (middle). Masking the region corresponding to AP2 and subtracting this density from the full map gives a pseudo difference density map (right).

**B.** Solution structure of NECAP<sub>PHear</sub> (PDB 1TQZ) docked into the difference density from (A). NECAP<sub>PHear</sub> comprises a single alpha helix and beta sheet, which can be clearly seen in the cryo-EM density. However, the solution structure has some conformational differences compared to the AP2-bound cryo-EM structure.

**C.** The molecular model for NECAP<sub>PHear</sub> and AP2 mu (AA 154-158) are shown in the cryo-EM density. PDB 1TQZ was used as a starting model to manually rebuild in Coot and refine using Rosetta.



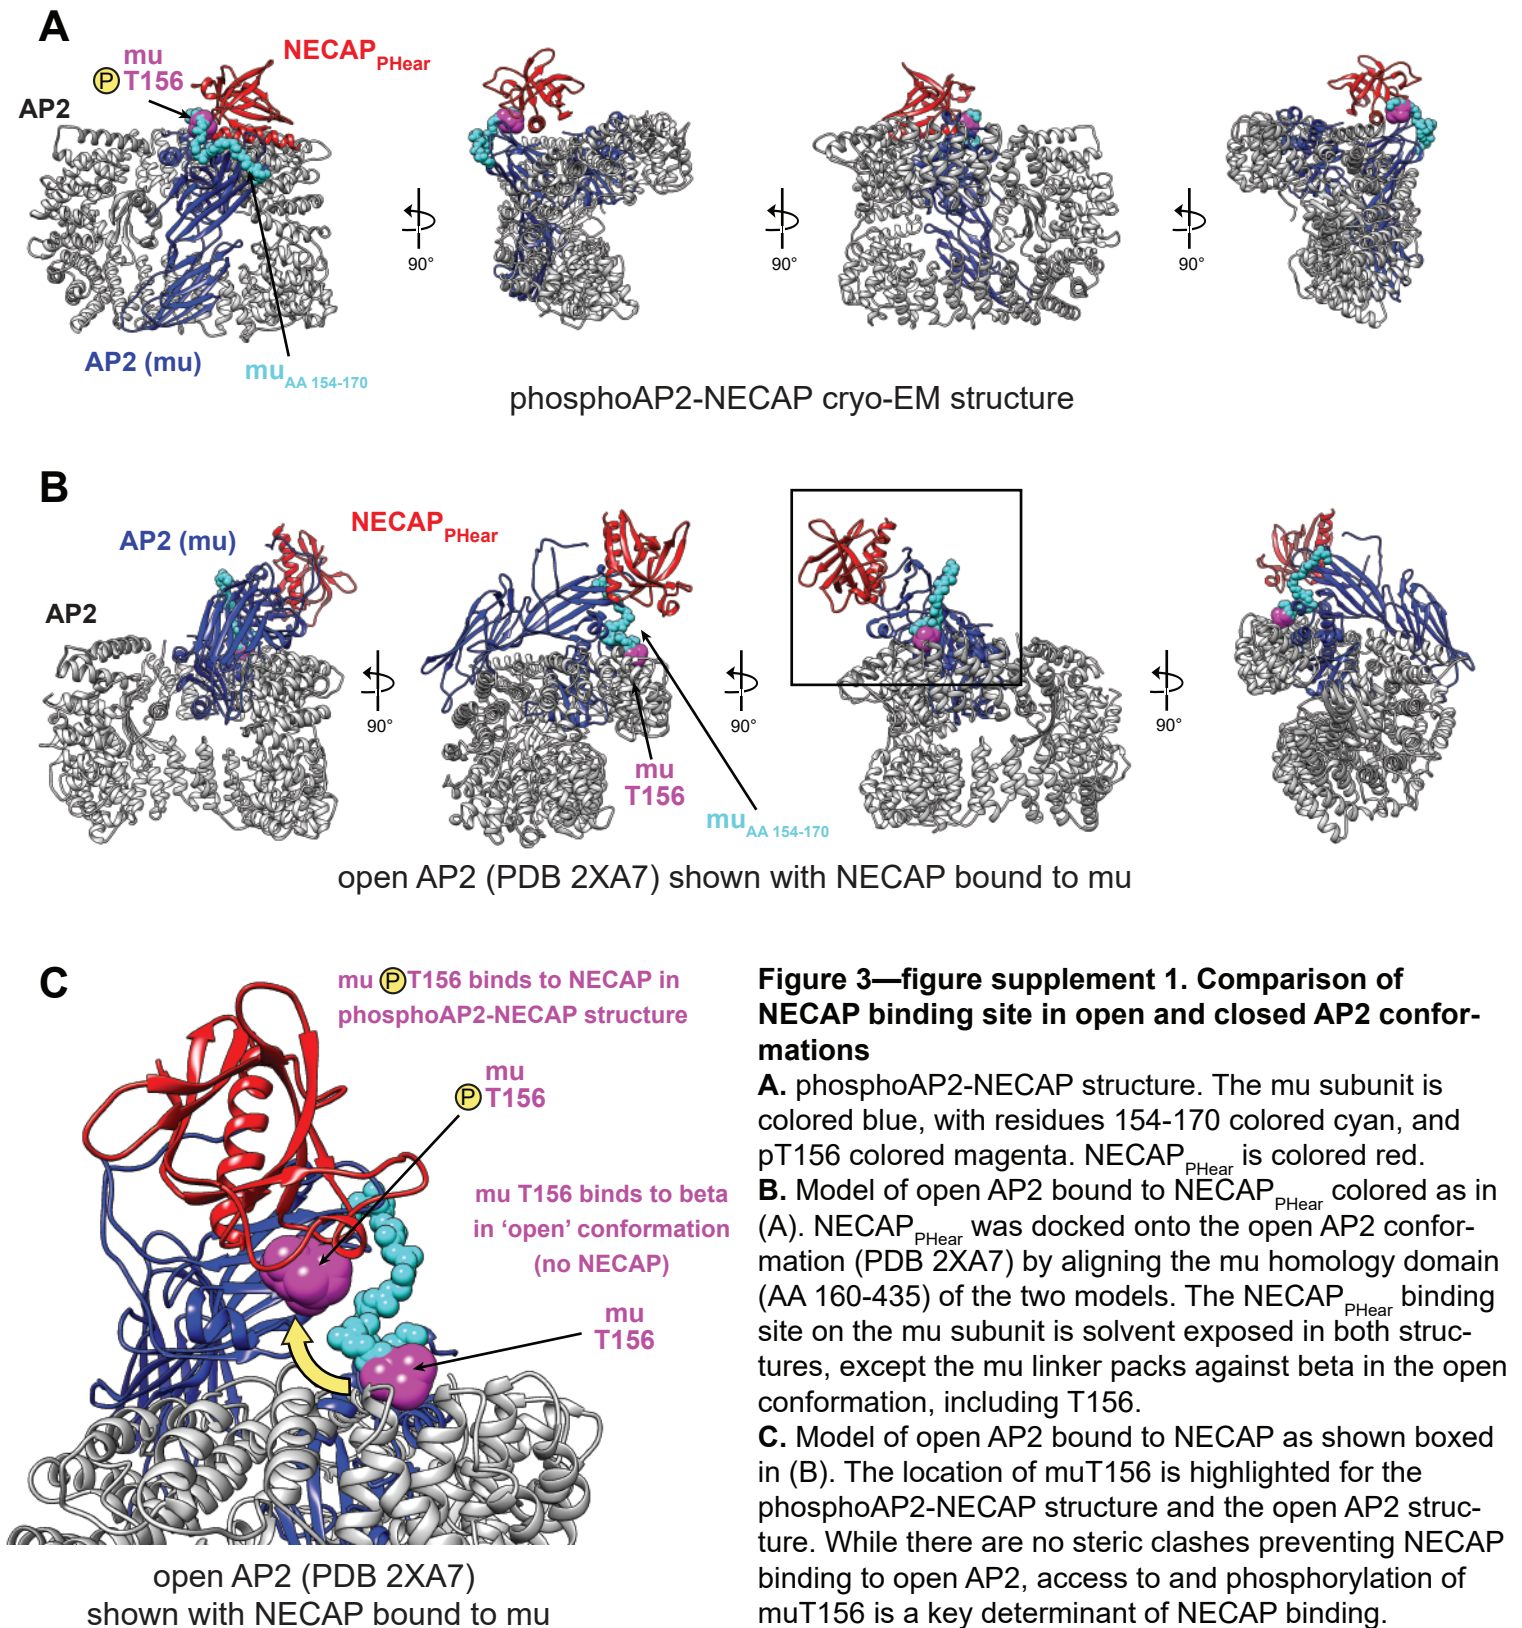

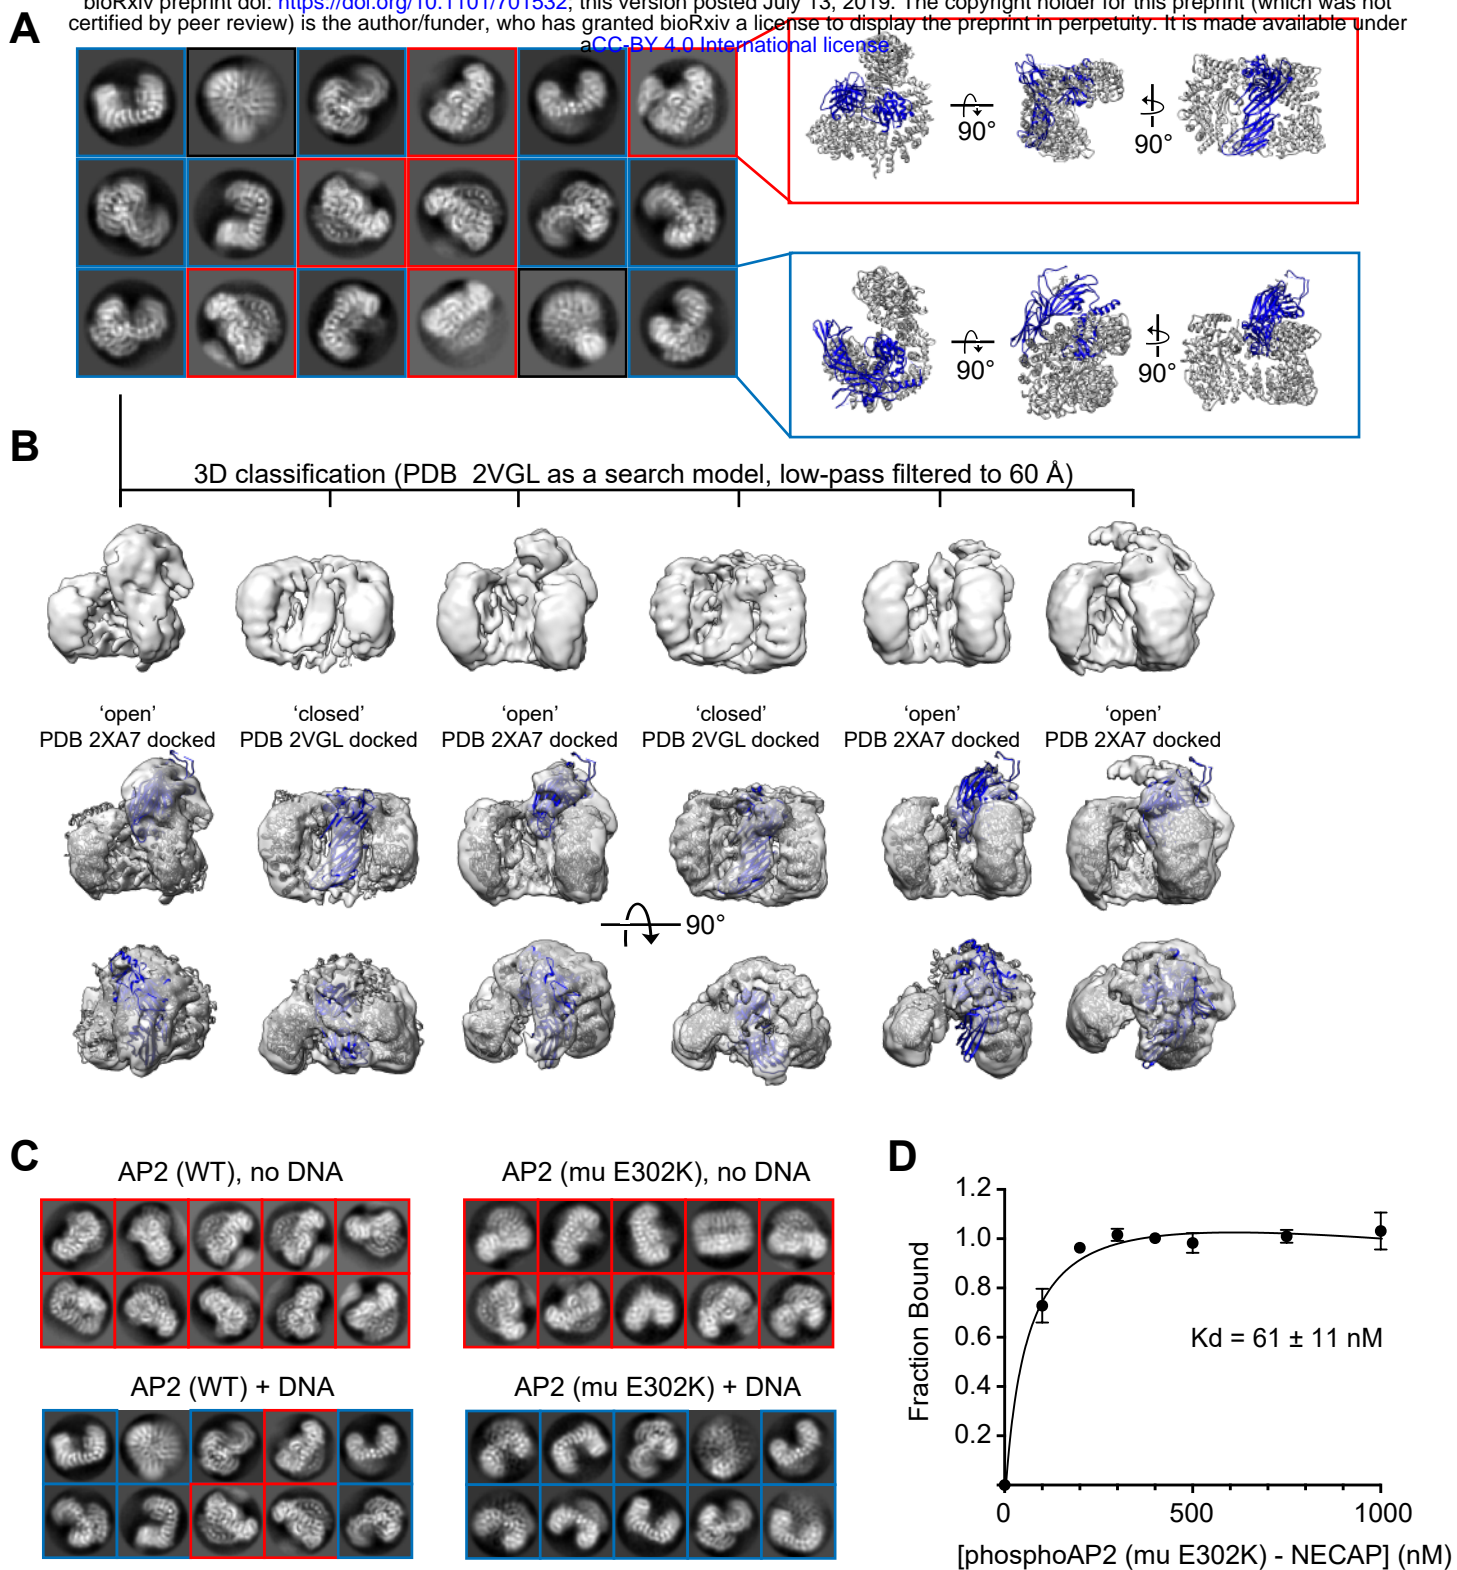

**Figure 4—figure supplement 1. Cryo-EM analysis of AP2 in the presence of an anionic polymer (DNA).**

**A.** 2D class averages for WT AP2 + DNA are shown. Averages corresponding to the closed conformation (red inset) and open conformation (blue inset) are shown next to their respective molecular models (PDB 2VGL; PDB 2XA7).

**B.** 3D classification shows that the dataset contains a mixture of open and closed conformations. Classification was performed in Relion 3. Resolution is limited for all open structures because of an extreme preferred orientation in the cryo-EM grids.

**C.** Representative 2D class averages from AP2 samples. Mutations and the presence of DNA are labeled. DNA is in a 5-fold molar excess. Closed 2D classes are boxed in red, open 2D classes are boxed in blue.

**D.** Binding curve of phosphoAP2(mu E302K)-NECAP and a 47 bp ssDNA oligo. 20 nM DNA was incubated with increasing amounts of phosphoAP2-NECAP. A native gel shift assay was used to measure binding. Data was plotted and analyzed using the Prism software package.

**A** Data collection: 1126 movies

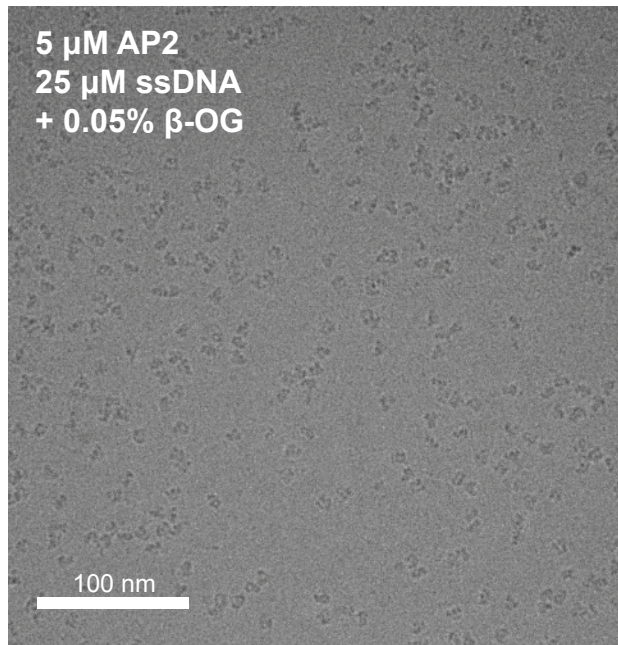

**B** 2D classification: 717,231 particles (2.32 Å/ pixel)

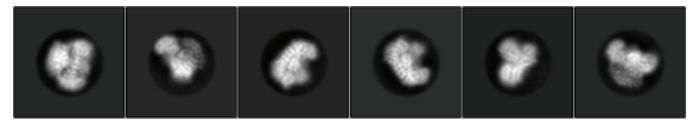

2D classification  
Particle re-centering  
388,995 particles (2.32 Å/ pixel)

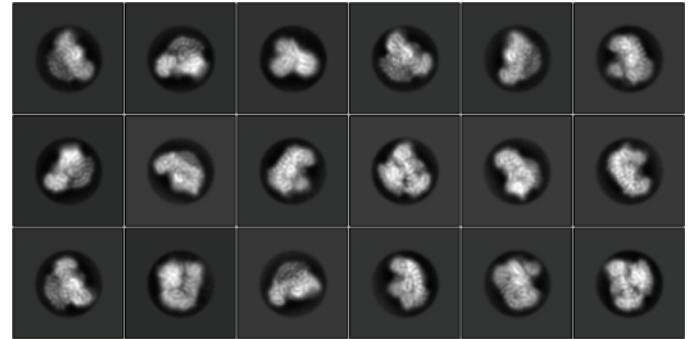

*ab initio* model generation (cryoSPARC v2)  
388,962 particles (1.16 Å/ pixel)

Non-Uniform refinement (cryoSPARC v2)  
324,922 particles (1.16 Å/ pixel)

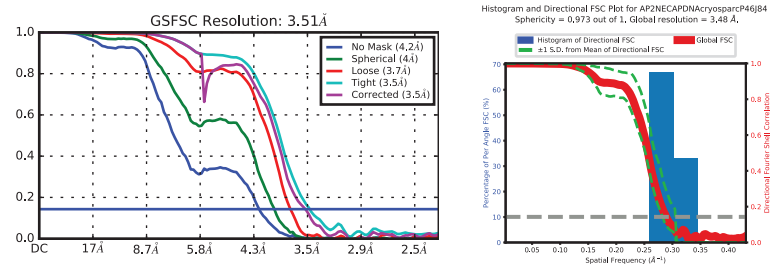

**C**

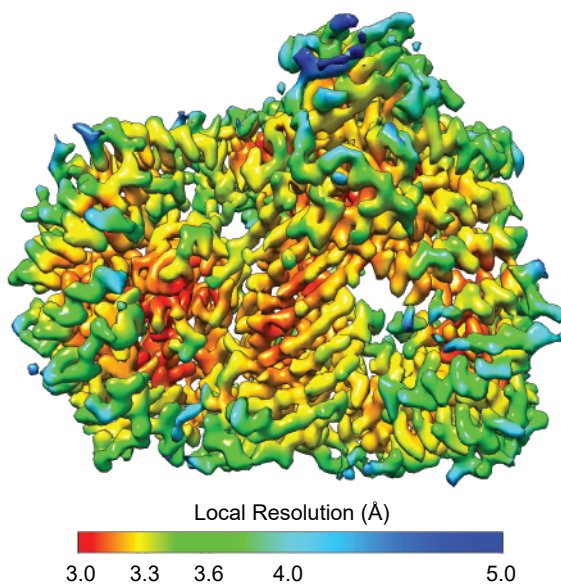

**Figure 5—figure supplement 1. Cryo-EM data collection, processing, and model building for phosphoAP2-NECAP-DNA ‘clamped’ structure.**

**A.** Representative motion-corrected, dose-weighted cryo-EM micrographs of phosphoAP2-NECAP-DNA complex.

**B.** Classification and refinement pipeline used for structure determination. Particles were extracted and 2D classified in Relion3. ‘Clean’ particles were re-extracted and used for *ab initio* model generation and refinement in cryoSPARC v2. 2D and 3D FSC plots are shown for the final model.

**C.** Final cryo-EM structure colored by local resolution.

**D.** Histogram plot of C $\alpha$  RMSD of top ten molecular models from Rosetta refinement. Inset shows molecular model colored and scaled by RMSD.

**D**

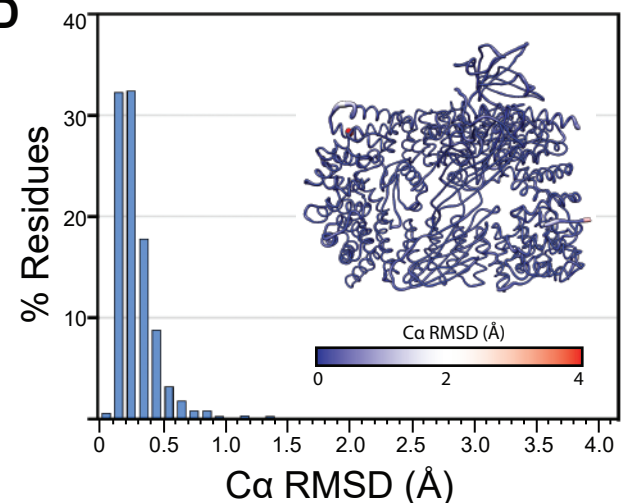

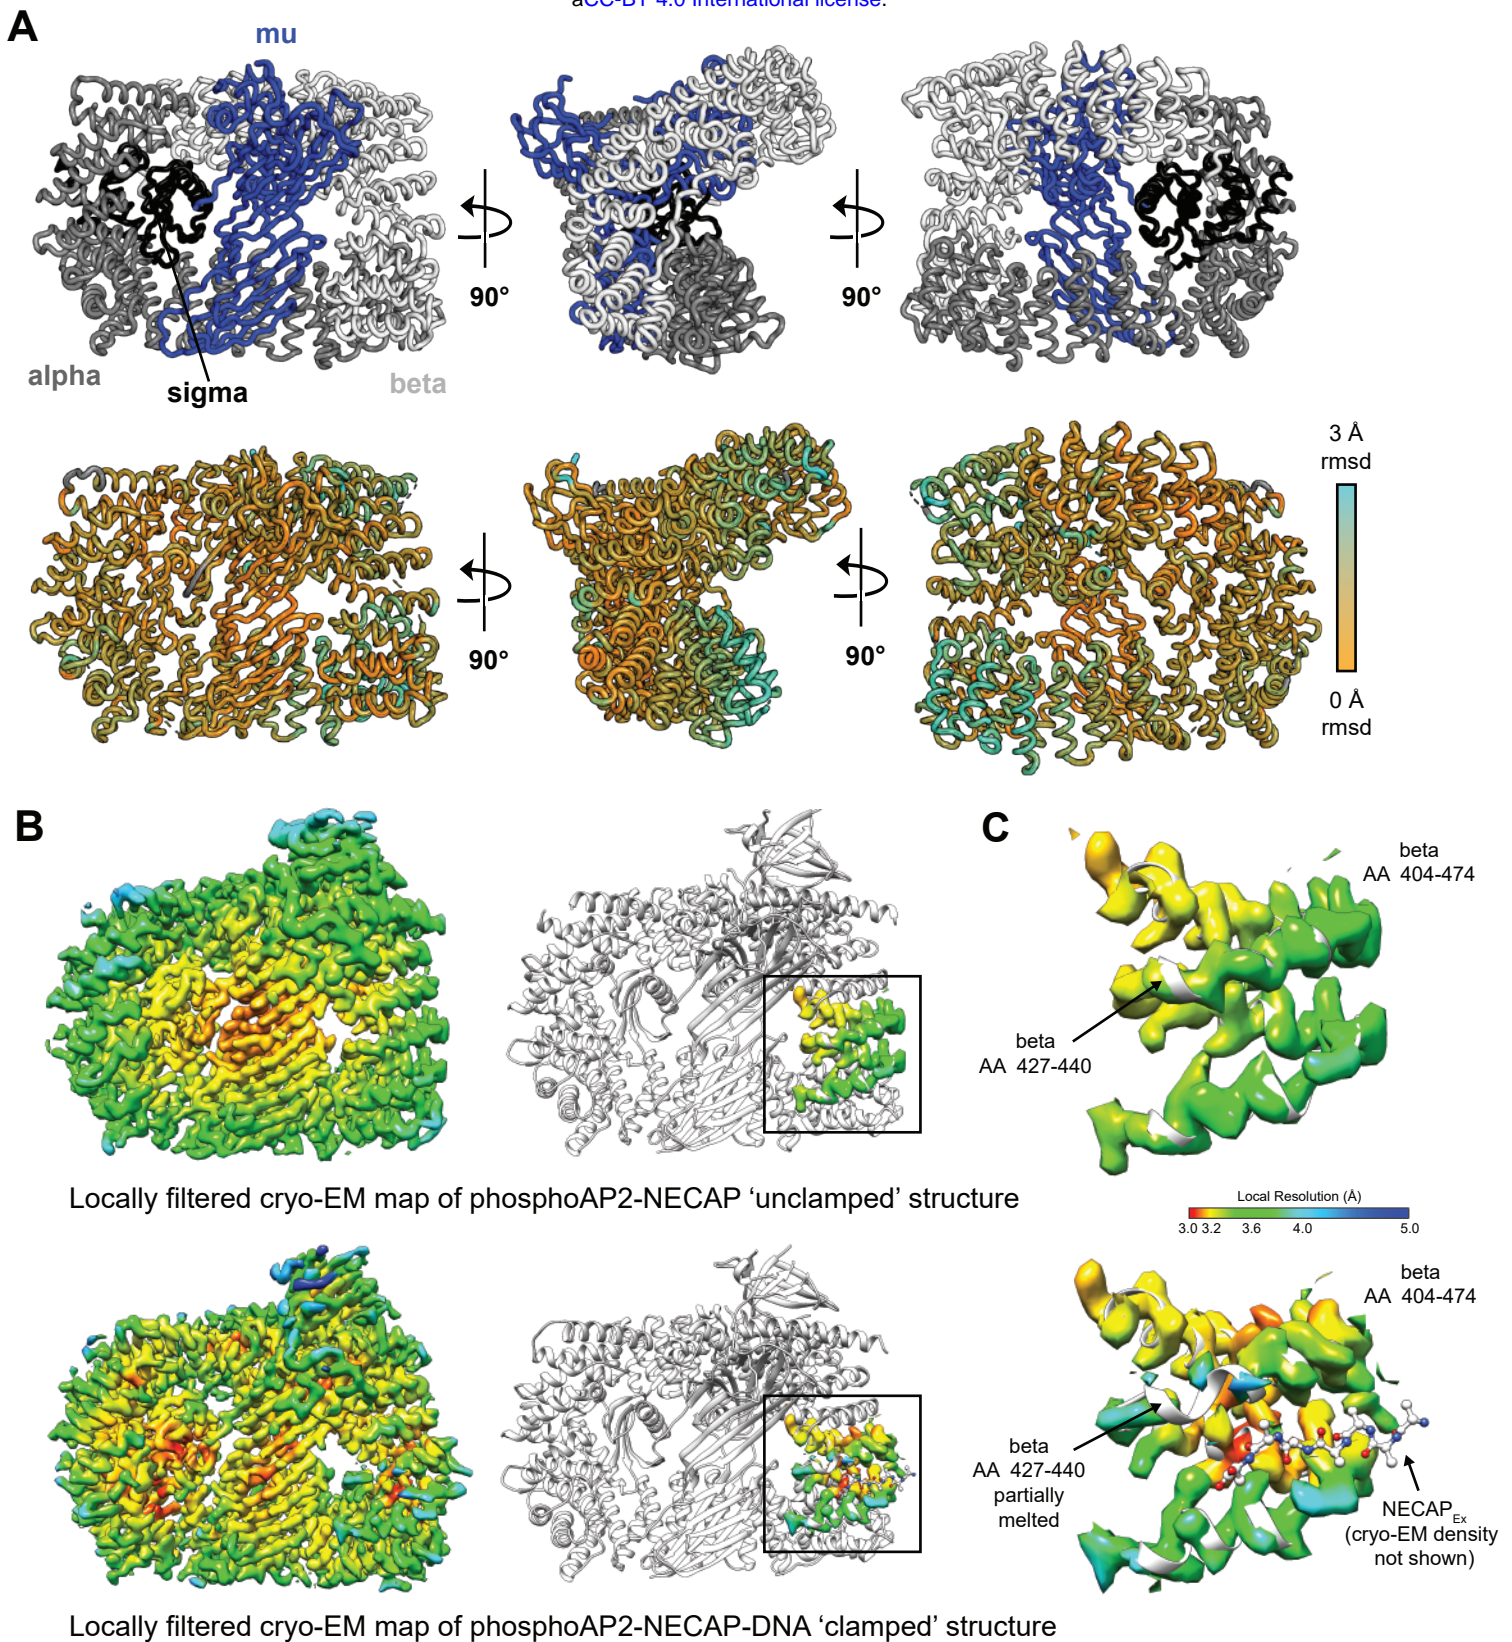

### Figure 5—figure supplement 2. Structural comparison of 'unclamped' and 'clamped' phosphoAP2-NECAP structures

**A.** Cartoon diagram of phosphoAP2-NECAP 'unclamped' structure. NECAP is not shown. Top: AP2 subunits are colored as labeled. Bottom: AP2 is colored by per-residue RMSD. Values were calculated in PyMol using whole-molecule alignment of 'unclamped' vs 'clamped' phosphoAP2-NECAP.

**B.** Cryo-EM maps of 'unclamped' (top) and 'clamped' (bottom) phosphoAP2-NECAP structures. Maps were locally filtered by local resolution to standardize comparison between maps. Cryo-EM density corresponding to beta AA 404-474 is shown (right). Both maps are colored by local resolution using the same color gradient (color key in (C)).

**C.** The NECAP<sub>Ex</sub> binding site (beta AA 404-474) is shown for the 'unclamped' phosphoAP2-NECAP (top) and 'clamped' phosphoAP2-NECAP (bottom) structures. A small region of beta partially melts when the Ex domain is bound.

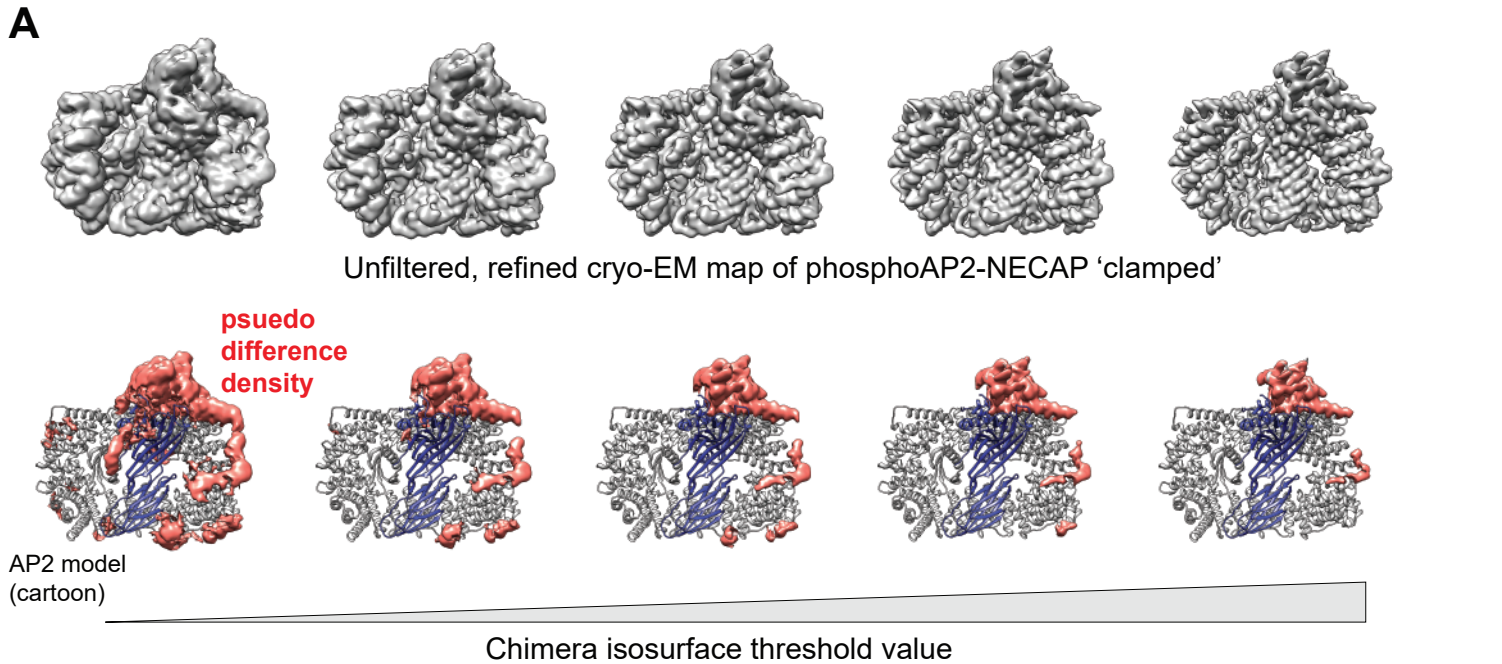

**Figure 6—figure supplement 1. The NECAP<sub>Ex</sub> domain binds along the surface of the beta subunit**

**A.** The unfiltered, refined cryo-EM map of 'clamped' phosphoAP2-NECAP is shown at different isosurface threshold levels (top). A psuedo difference density map was made in Chimera by masking the region corresponding to AP2 and subtracting this map from the full map (bottom). The remaining density is shown colored salmon. The same threshold levels are shown top and bottom.

**B.** The psuedo difference density from (A) is shown at a low threshold level and with a Gaussian filter applied. Regions of the map corresponding to obvious AP2 features, such as loops omitted from our molecular model, were manually removed in Chimera. We hypothesize that a region of NECAP<sub>Ex</sub> cryo-EM density (boxed in red) corresponds to a conserved region of the sequence called the KEG motif (AA 153-154). This is consistent with structural restraints based on the distance of this motif (16 residues) from the C-terminus of NECAP<sub>PHear</sub> in our molecular model (AA 8-137).

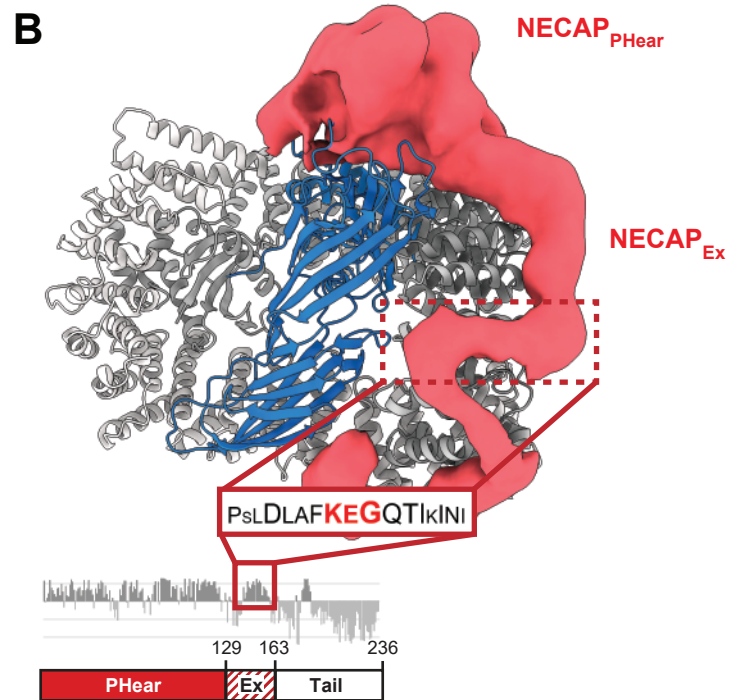

Source: https://www.biorxiv.org/content/10.1101/701532v1.full.pdf
